1 **ARTICLE**

2

3 **TITLE: Yolk sac erythromyeloid progenitors sustain erythropoiesis throughout**  
4 **embryonic life**

5

6 **AUTHORS:**

7 Francisca Soares-da-Silva<sup>1,2,3,4</sup>, Odile Burlen-Defranoux<sup>1,5</sup>, Ramy Elsaid<sup>1,5</sup>, Lorea  
8 Iturri<sup>6,7</sup>, Laina Freyer<sup>6</sup>, Odile Sismeiro<sup>8</sup>, Perpétua Pinto-do-Ó<sup>2,3</sup>, Elisa Gomez-  
9 Perdiguero<sup>6</sup>, Ana Cumano<sup>1,5,\*</sup>

10

11 **AUTHOR AFFILIATIONS:**

12

13 <sup>1</sup>Unit for Lymphopoiesis, Immunology Department, INSERM U1223, Institut Pasteur,  
14 75015, Paris, France.

15 <sup>2</sup>i3S – Instituto de Investigação e Inovação em Saúde & INEB – Instituto Nacional de  
16 Engenharia Biomédica, Universidade do Porto, 4200-135, Porto, Portugal.

17 <sup>3</sup>ICBAS – Instituto de Ciências Biomédicas Abel Salazar, Universidade do Porto,  
18 4050-313, Porto, Portugal.

19 <sup>4</sup>Graduate Program in Areas of Basic and Applied Biology, Instituto de Ciências  
20 Biomédicas Abel Salazar, Universidade do Porto, 4050-313 Porto, Portugal

21 <sup>5</sup>Université Paris Diderot, Sorbonne Paris Cité, Cellule Pasteur, 75018, Paris, France.

22 <sup>6</sup>Department of Developmental and Stem Cell Biology, CNRS UMR3738, Department  
23 of Immunology, Institut Pasteur, 75015, Paris, France.

24 <sup>7</sup>Sorbonne Université, Collège Doctoral, F-75005 Paris, France

25 <sup>8</sup>Institut Pasteur, Transcriptome and EpiGenome, Biomics Center for Innovation and  
26 Technological Research, Paris, France

27

28 \*Correspondence: [ana.cumano@pasteur.fr](mailto:ana.cumano@pasteur.fr)

29

30 Running title: Yolk sac drives embryonic erythropoiesis

31 Key words: Erythropoiesis; embryo; yolk sac; fetal liver; hematopoietic stem cells

32

33 **Abstract**

34

35 The first hematopoietic cells are produced in the yolk sac and are thought to be rapidly  
36 replaced by the progeny of hematopoietic stem cells. Here we document that  
37 hematopoietic stem cells do not contribute significantly to erythrocyte production up  
38 until birth. Lineage tracing of yolk sac-derived erythromyeloid progenitors, that also  
39 contribute to tissue resident macrophages, shows a progeny of highly proliferative  
40 erythroblasts, that after intra embryonic injection, rapidly differentiate. These  
41 progenitors, similar to hematopoietic stem cells, are *c-Myb* dependent and are  
42 developmentally restricted as they are not found in the bone marrow. We show that  
43 erythrocyte progenitors of yolk sac origin require lower concentrations of erythropoietin  
44 than their hematopoietic stem cell-derived counterparts for efficient erythrocyte  
45 production. Consequently, fetal liver hematopoietic stem cells fail to generate  
46 megakaryocyte and erythrocyte progenitors. We propose that large numbers of yolk  
47 sac-derived erythrocyte progenitors have a selective advantage and efficiently  
48 outcompete hematopoietic stem cell progeny in an environment with limited availability  
49 of erythropoietin.

## 50 Introduction

51

52 Erythrocytes are the most abundant cells in circulation, they transport oxygen  
53 and have a half-life of around 22 days in the mouse, therefore, constant production in  
54 the bone marrow (BM) is required to maintain the numbers of circulating red blood  
55 cells (RBCs).

56 Erythropoiesis is the process whereby hematopoietic stem cells (HSC)  
57 progressively differentiate into erythro-megakaryocyte and later into lineage-  
58 committed erythroid progenitors, immature burst forming unit – erythroid (BFU-E) and  
59 the more mature colony-forming unit erythroid (CFU-E). CFU-E successively progress  
60 in differentiation through nucleated proerythroblast, basophilic, polychromatophilic  
61 and orthochromatic stages, enucleation and formation of RBCs. The distinct stages of  
62 erythroid differentiation are characterized by changes in surface expression of the  
63 progenitor marker Kit, of the transferrin receptor CD71, of the adhesion molecule  
64 CD44 and of the mature erythroid marker Ter119 (Kina *et al.*, 2000; Aisen, 2004; Chen *et*  
65 *al.*, 2009).

66 During mouse embryogenesis three overlapping hematopoietic waves emerge  
67 in distinct anatomic sites. The first blood cells arise in the yolk sac (YS) blood islands  
68 at embryonic day (E) 7.5 and belong to the macrophage, erythroid and megakaryocytic  
69 lineages (Palis *et al.*, 1999). Primitive erythrocytes are large nucleated cells that express  
70 a specific pattern of embryonic ( $\epsilon\gamma$ - and  $\beta$ H1-) globins (Kingsley *et al.*, 2006).  
71 Erythromyeloid progenitors (EMPs) arise in the YS around E8.5 (Bertrand *et al.*, 2005),  
72 differentiate into erythrocytes, megakaryocytes, macrophages and other myeloid  
73 lineages such as neutrophils, granulocytes and mast cells, but lack HSC activity (Palis  
74 *et al.*, 1999; McGrath *et al.*, 2015a, 2015b). EMP-derived erythrocytes resemble definitive  
75 erythrocytes and express embryonic  $\beta$ H1- and adult  $\beta$ 1- but no  $\epsilon\gamma$ -globins (McGrath *et*  
76 *al.*, 2011). Immature HSC (imHSC) emerge after E8.5 (E8.5-E11.5) (Cumano *et al.*, 1996;  
77 de Bruijn *et al.*, 2000; Taoudi *et al.*, 2008; Bertrand *et al.*, 2010; Kissa and Herbomel, 2010;  
78 Kieusseian *et al.*, 2012) in the major arteries, through an endothelial to hematopoietic  
79 transition process, rapidly enter circulation and colonize the fetal liver (FL) where they  
80 expand and differentiate, generating the blood lineages. EMP that arise through a  
81 similar process in the YS (Frame *et al.*, 2016; Kasaai *et al.*, 2017) also converge to the FL  
82 where they are identified as Kit<sup>+</sup>CD16/32<sup>+</sup> in contrast to Kit<sup>+</sup>CD16/32<sup>-</sup> imHSC.

83 The analysis of *c-Myb* mutants, where primitive hematopoiesis is preserved but  
84 HSC-derived hematopoiesis is lacking, indicated that YS-derived primitive  
85 hematopoietic cells sustain embryonic life up until E15.5 (Mucenski *et al.*, 1991; Tober *et*  
86 *al.*, 2008; Schulz *et al.*, 2012). Mice mutant for the Runx1 partner CBF $\beta$  have impaired  
87 EMP and HSC formation and lack long-term reconstitution activity (Wang *et al.*, 1996).  
88 Selective expression of CBF $\beta$  in Tek or Ly6a expressing cells results in the rescue of  
89 YS EMP or HSC. In the absence of HSC activity, EMP-derived hematopoietic cells  
90 maintain viable embryos throughout development up until birth (Chen *et al.*, 2011).

91 YS hematopoiesis has long been considered a transient wave devoted to the  
92 production of erythrocytes, megakaryocytes and a few myeloid cells that ensure  
93 oxygenation and tissue hemostasis. Thus, HSCs-derived hematopoiesis was thought  
94 to replace YS-derived cells shortly after HSC migrate to the FL at E10.5 (Palis, 2016).  
95 Recently, however, growing evidence endows the YS with the capacity to contribute  
96 to tissue resident cells such as macrophages that persist throughout life (Gomez  
97 Perdiguero *et al.*, 2015) and mast cells (Gentek *et al.*, 2018) maintained up until birth.  
98 Primitive erythrocytes were also shown to persist throughout gestation (Fraser *et al.*,  
99 2007) and EMP-derived cells contribute to the erythrocyte compartment for more than  
100 20 days upon transplantation (McGrath *et al.*, 2015a). Nonetheless, it has been difficult  
101 to establish the temporal relative contribution of EMP or HSC-derived progenitors to  
102 erythropoiesis because they share surface markers and transcriptional regulators and  
103 are therefore indistinguishable.

104 Here we report a large population of Kit<sup>+</sup>CD45<sup>-</sup>Ter119<sup>-</sup> erythroid progenitors  
105 unique to FL, comprising >70% of E14.5 Ter119<sup>-</sup>CD45<sup>-</sup> cells (>10% of FL cells). These  
106 are the most actively proliferating progenitors at early stages and progress in erythroid  
107 differentiation through the upregulation of the surface marker CD24 concomitant with  
108 that of CD71, with subsequent loss of Kit and upregulation of Ter119. These cells that  
109 require *c-Myb* expression originate from YS EMP as they are co-labeled with microglia  
110 in the Csf1r<sup>MeriCreMer</sup>Rosa26<sup>YFP</sup> lineage-tracer model. They persist through fetal life and  
111 are the major contributors to the RBC compartment. In a lineage tracer model, we  
112 show that Flt3 expressing progenitors that comprise most HSC progeny do not  
113 contribute significantly to embryonic erythropoiesis. HSC erythroid progenitors require  
114 higher concentrations of erythropoietin (Epo) than their YS-derived counterparts, for

115 erythrocyte differentiation. The limiting amounts of Epo available in the embryo results  
116 in a selective advantage of YS-derived over HSC-derived erythropoiesis.

## 117 **Results**

118

### 119 **A unique population of Kit<sup>+</sup> cells represents the majority of FL Ter119<sup>-</sup>CD45<sup>-</sup>** 120 **cells**

121 We analyzed, by flow cytometry, Kit expression in the FL together with  
122 antibodies that identify erythrocytes, hematopoietic, endothelial and epithelial cells at  
123 different embryonic time-points. We detected a large fraction of Kit<sup>+</sup> cells (>50%)  
124 expressing neither Ter119 nor CD45 (Fig. 1A, Supplementary Fig. 1A). Single-cell  
125 surface marker expression data from E14.5 FL cells was projected as tSNE1 vs tSNE2  
126 (Fig. 1A) and three major clusters were defined by the expression of epithelial cadherin  
127 (E-Cadherin/CD324) on epithelial cells, platelet/endothelial cell adhesion protein  
128 (PECAM-1/CD31) on endothelial cells and Kit. Combined analysis of Kit expression  
129 together with CD24 frequently associated with immature hematopoietic cells further  
130 defined 3 populations in the Ter119<sup>-</sup>CD45<sup>-</sup>CD31<sup>-</sup>CD324<sup>-</sup> compartment: Kit<sup>+</sup>CD24<sup>-</sup>  
131 (hereafter called P1), Kit<sup>+</sup>CD24<sup>+</sup> (P2) and CD24<sup>+</sup>Kit<sup>-</sup> (P3) cells (Fig. 1B;  
132 Supplementary Fig. 1A). P1 cells decreased while P2, and subsequently P3 cells  
133 increased as gestation progressed (Fig. 1C). Numbers of P2 cells reached a maximum  
134 (around 10<sup>6</sup> cells per FL) at E14-15 and decreased thereafter, although they were still  
135 detected around birth (E18.5) (Fig. 1D). Kit<sup>+</sup>CD45<sup>-</sup>Ter119<sup>-</sup>Lin<sup>-</sup> (P1 and P2) cells were  
136 also negative for the expression of Sca-1 that marks multipotent progenitors, for  
137 CD16/32 that marks GM progenitors and for CD34 marking common myeloid  
138 progenitors (CMP) and therefore they fall in a gate that typically defines  
139 megakaryocyte/erythrocyte progenitors (MEP) in the FL and in the BM  
140 (Supplementary Fig. 1B). Unlike their BM counterparts however, where all Kit<sup>+</sup> cells  
141 co-expressed CD45, most FL Kit<sup>+</sup> (P1 and P2) cells within the LK compartment did not  
142 express CD45 (Fig. 1E and 1F) raising the possibility that they did not belong to the  
143 hematopoietic lineage. We therefore identified a major population of Kit<sup>+</sup>CD45<sup>-</sup>Ter119<sup>-</sup>  
144 cells unique to FL of undefined lineage affiliation and origin.

145

### 146 **P1 and P2 cells in the FL have an erythroid progenitor signature**

147 To investigate the cellular identity of Kit<sup>+</sup>CD45<sup>-</sup>Ter119<sup>-</sup> FL cells we performed  
148 RNA sequencing of the three major populations P2, CD324<sup>+</sup> and CD31<sup>+</sup> cells. Within  
149 the highest expressed transcripts in P2 cells were *Myb*, *Bcl11a*, *Klf1*, *Gata1* and *Epor*,  
150 hematopoietic specific transcripts most of which are associated with erythrocyte

151 differentiation (Fig. 2A). The 122 genes upregulated >2-fold in P2 vs CD324<sup>+</sup> cells  
152 were subjected to gene ontology analysis using *Enrichr* (Chen *et al.*, 2013) (List of  
153 submitted genes in Supplementary Table 1). The top biological processes and tissue  
154 associated genes revealed an erythrocyte/erythroblast profile (Fig. 2B). These results  
155 were validated by Q-RT-PCR indicating that *Gata1*, *Lmo2*, *Klf1* and *Epor* expressions  
156 gradually increased from P1 to P3 cells, with the latter showing comparable expression  
157 levels of these transcripts to Ter119<sup>+</sup> erythroblasts (Fig. 2C). Hemoglobin transcripts  
158 for *Hbb-y*, *Hbb-bh1* and *Hbb-b1* were detected in P3 cells but only significantly  
159 expressed in Ter119<sup>+</sup> cells. Multipotent hematopoietic associated transcription factors  
160 such as *c-Myb*, *Runx3* and *Bmi1* decreased as the erythroid specific transcripts  
161 increased. The results above indicated that the CD45<sup>-</sup> subsets (P1 and P2) identified  
162 by the expression of Kit and CD24 (also found on all erythrocytes), are erythroid  
163 progenitors and suggested a hierarchy where immature P1 cells further differentiate  
164 into P2 and later lose Kit expression (P3) before acquiring Ter119 expression, the  
165 definitive marker of erythroid identity.

166

### 167 **P1, P2 and P3 cells represent increasingly mature stages within the erythroid** 168 **lineage**

169 Erythroid differentiation has been characterized by the expression of CD71  
170 (transferrin receptor) and CD44, in Ter119<sup>+</sup> cells (McGrath *et al.*, 2017). Imaging flow  
171 cytometry (Fig. 3A) showed that the proerythroblast marker CD71 was low in P1 but  
172 expressed in P2 and highly expressed in all P3 cells (Fig. 3B), indicating they  
173 correspond to consecutive stages of erythrocyte development.

174 In BM and FL, progenitors that form small erythroid colonies (CFU-E) are  
175 characterized as Kit<sup>+</sup>CD71<sup>+</sup>Ter119<sup>-</sup> whereas low levels of Ter119 expression marks  
176 proerythroblasts that lost proliferative capacity (McGrath *et al.*, 2017). P2 FL cells  
177 express CD71 in the virtual absence of Ter119 indicating that they correspond to CFU-  
178 E. P3 cells express low levels of Ter119 (Fig. 3B) visible in 8% of them and express  
179 erythroid genes at levels similar to Ter119<sup>+</sup> erythroblasts (Fig. 2C) suggesting they  
180 correspond to proerythroblasts.

181 CD71 expression is limited to P2 and P3 cells indicating that CD71 and CD24 are  
182 redundant markers in this context, further confirmed by conventional flow cytometry  
183 (Supplementary Fig. 1C).

184 To examine the cell cycle status of the 3 cell subsets we injected timed pregnant  
185 females with the nucleotide analog 5-ethynyl-2'-deoxyuridine (EdU) to label newly  
186 synthesized DNA. E12.5 or E13.5 pregnant females were given 3 EdU injections with  
187 8h intervals and FLs were analyzed 2h after the last injection (Fig. 3C). 80% of P1  
188 E13.5 FL cells were labelled with EdU compared to around 50% of P2 and P3 cells.  
189 E14.5 FL cells show the same percentage of EdU incorporation (40-50%) in all 3  
190 subsets (Fig. 3D and 3E). Cell proliferation was further assessed by analyzing the  
191 expression of the nuclear protein Ki-67 that in association with DAPI allows  
192 distinguishing cells in G0, G1 and G2M phases of the cell cycle. Consistent with the  
193 EdU labelling experiments, P1 showed the lowest frequency of cells in G0 (~10%) and  
194 the highest frequency of cells expressing Ki-67, from which around 20% are actively  
195 synthesizing DNA (DAPI<sup>+</sup>) (Fig. 3F). By contrast, P3 cells show the lowest frequency  
196 of proliferating cells (Fig. 3F). Taken together these results indicated that P1 are the  
197 most proliferating cells and, as they transit onto the P2 and further into the P3 subset,  
198 lose proliferative activity.

199

## 200 **P2 and P3 cells are committed erythroid progenitors whereas P1 retain residual** 201 **myeloid potential**

202 To assess the differentiation potential of CD45<sup>-</sup>Kit<sup>+</sup> FL cells we performed  
203 differentiation assays in liquid cultures and in semi-solid colony assays (Fig. 4A and  
204 4B). E13.5 P1, P2, P3 and Lin<sup>-</sup>CD45<sup>+</sup>Kit<sup>+</sup>Sca1<sup>-</sup> (LK) cells, as control, were sorted and  
205 cultured in the presence of Scf, Epo, Tpo, M-CSF and GM-CSF to allow differentiation  
206 into erythroid, megakaryocyte and myeloid lineages. Limiting-dilution analysis showed  
207 that P1 and P2 gave rise to hematopoietic colonies at frequencies similar to that of LK  
208 cells (1 in 1 for LK and P1, 1 in 2 for P2 cells) while P3 cells did not divide significantly  
209 in culture (less than 1 colony in 2592 wells analyzed) (Fig. 4A). In colony assays both  
210 P1 and P2 cells gave a majority of CFU-E (more than 50% of plated cells). P1 cells  
211 generated also BFU-E (<5%), CFU-M (5%) and CFU-Mk (5%) whereas control (LK)  
212 generated a majority of myeloid colonies (CFU-G, CFU-GM and CFU-GEMM) and less  
213 than 5% of CFU-E (Fig. 4B).

214 We then probed the differentiation potential of P2 cells *in vivo*. Cells purified  
215 from E13.5 UBC-GFP embryos were injected into E13.5 C57/BL6 recipient embryos,  
216 *in utero* (Fig. 4C). FL and blood collected three days later indicated that GFP<sup>+</sup>P2  
217 originated exclusively GFP<sup>+</sup>Ter119<sup>+</sup> cells whereas LK generated a majority of myeloid



218 cells detected both in FL and in blood (Fig. 4D and 4E) while none gave rise to  
219 lymphocytes.

220 These results demonstrated that P2 FL cells are committed erythroid  
221 progenitors while P1 cells retain residual *in vitro* myeloid differentiation potential.

222

### 223 **P1/P2 progenitors require *c-Myb* expression**

224 The transcription factor *c-Myb* is essential for adult hematopoiesis. *Myb*<sup>-/-</sup>  
225 embryos have impaired definitive hematopoiesis that affects all lineages and are not  
226 viable after E15. Only primitive YS-derived erythropoiesis, primitive megakaryocytes  
227 (Tober *et al.*, 2008) and tissue-resident macrophages (Schulz *et al.*, 2012) have been  
228 described in *c-Myb* mutants. To test whether P1/P2 FL cells were affected by the *c-*  
229 *Myb* mutation we analyzed *Myb*<sup>+/-</sup> and *Myb*<sup>-/-</sup> E14.5 embryos. Ter119<sup>+</sup> cells were  
230 drastically decreased in frequency and numbers in *Myb*<sup>-/-</sup> FLs when compared to  
231 heterozygous littermates (Fig. 5A and 5B). P1 cells were undetectable in *Myb*<sup>-/-</sup> while  
232 P3 cells were present, albeit in reduced numbers (Fig. 5B). *c-Myb* was reported to  
233 regulate c-Kit expression (Ratajczak *et al.*, 1998) and because we failed to detect Kit<sup>+</sup>  
234 (P1 and P2) cells in the *Myb*<sup>-/-</sup> FL we considered the possibility that erythroid  
235 progenitors, although unable to express Kit, might be present in mutant FL. We sorted  
236 E14.5 CD24<sup>-</sup>, CD24<sup>+</sup> and Ter119<sup>+</sup> cells from *Myb*<sup>+/-</sup> and *Myb*<sup>-/-</sup> FLs and analyzed the  
237 expression of erythroid genes. *Epor*, *Tal1* and *Klf1* were not detected in CD24<sup>-</sup> and  
238 CD24<sup>+</sup>*Myb*<sup>-/-</sup>, compared to *Myb*<sup>+/-</sup> cells (Fig. 5C). Only Ter119<sup>+</sup> cells expressed  
239 detectable levels of *Epor* and *Tal1* together with high levels of *Hbb-y* indicating they  
240 represent primitive erythrocytes. Of note, *Klf1*, a transcription activator of the β-globin  
241 promoter, was not expressed in primitive Ter119<sup>+</sup>*Myb*<sup>-/-</sup> cells (Fig. 5C). These results  
242 demonstrated that differentiation and/or survival of CD45<sup>-</sup>Kit<sup>+</sup> erythroid progenitors  
243 required the transcription factor *c-Myb*.

244

### 245 **P1/P2 cells originated from YS progenitors and were major contributors to** 246 **embryonic erythropoiesis**

247 P1/P2 (CD45<sup>-</sup>Kit<sup>+</sup>) cells were not detected in the adult BM, suggesting that they  
248 represent a transient hematopoietic population. To assess the origin of P1/P2 FL cells  
249 we analyzed FL cells from *Csf1r*<sup>MeriCreMer</sup>*Rosa26*<sup>YFP</sup> pregnant females pulsed with a  
250 single dose of OH-TAM at E8.5 (Fig. 6A). Induction of the Cre recombinase at this  
251 developmental stage marks tissue resident macrophages but virtually no HSC-derived

252 progenitors (Gomez Perdiguero *et al.*, 2015). At E11.5, P1 and P2 cells were labelled to  
253 comparable levels of those in the microglia, taken as positive control (Fig. 6B). In  
254 subsequent days the frequency of YFP labelled P3 and erythroblast (Lin<sup>+</sup>CD71<sup>+</sup>) cells,  
255 that represent more differentiated erythroid subsets than P2, increased whereas that  
256 of more immature P1 decreased. In line with previous reports YFP labelled LSK cells  
257 were undetectable (Fig. 6B, Supplementary Fig. 2). The dynamic of YFP labelled  
258 erythroid progenitors is consistent with a progression in erythroid differentiation and  
259 indicates a lineage relationship between the 3 subsets. The frequency of YFP labelled  
260 P1 and P2 decreases between E11.5 and E13.5, a dynamic that is best explained by  
261 a fast differentiation progression.

262 We considered the possibility that YFP<sup>+</sup> and YFP<sup>-</sup> CD45<sup>+</sup>Kit<sup>+</sup> FL cells  
263 represented two distinct populations. To test for this hypothesis, we sorted YFP  
264 positive and negative P1, P2 and P3 cells from E13.5 FL pulsed at E8.5 and performed  
265 single cell multiplex gene expression analysis for progenitor, erythroid and myeloid  
266 genes. Unsupervised hierarchical clustering did not segregate YFP<sup>+</sup> from YFP<sup>-</sup> cells  
267 indicating that they have a similar transcriptional profile and therefore likely do not  
268 represent two divergent progenitor populations (Fig. 6C). Cluster I and IV contained  
269 P1 cells characterized by the expression of *Gata1*, *Lmo2* and *c-Myb*. Cluster I differed  
270 from Cluster IV by high frequency of cells expressing *Epor*, *Tal1* and *Klf1*. Interestingly,  
271 few cells in this cluster also co-expressed the myeloid factors *Runx1*, *Gata2*, *Zfp1*  
272 and *Mpl*, suggesting a broad myeloid transcriptional priming, consistent with data from  
273 *in vitro* differentiation assays (Fig. 4B). Few cells segregated from all other in Cluster  
274 II defined by expression of *Csf3r*, *Ly6c* and *Runx2* in the absence of erythroid  
275 associated transcripts. Cluster III comprises a majority of P2 cells, expressing high  
276 levels of erythroid genes and low levels of hemoglobin, thus defining a transitional  
277 erythroid population. Cluster V contains P3 cells that express high levels of  
278 hemoglobin in the absence of *c-Kit* or *c-Myb*.

279 To analyze the differentiation trajectory between the 3 populations we  
280 generated a diffusion map and according with the previous observations obtained a  
281 trajectory in which P1 cells progress through a P2 stage and subsequently a P3 stage  
282 (Fig. 6D). This differentiation trajectory is in line with the gene expression data (Fig.  
283 2C), with the imaging flow cytometry results (Fig. 3A) and with the clonal differentiation

284 assays (Fig. 4B). YFP<sup>+</sup> and YFP<sup>-</sup> cells do not show distinct trajectories indicating they  
285 do not represent different progenitor subsets (Fig. 6D).

286

### 287 **HSC do not contribute to erythropoiesis up until birth**

288 To evaluate HSC contribution to fetal erythropoiesis we analyzed  
289 Flt3<sup>Cre</sup>Rosa26<sup>YFP</sup> embryos where multipotent progenitors (MPP Flt3<sup>+</sup>) of HSC origin  
290 and their progeny express YFP (Benz *et al.*, 2008; Buza-Vidas *et al.*, 2011) in addition to  
291 a transient population of Flt3<sup>+</sup> progenitors recently identified (Beaudin *et al.*, 2016) (Fig.  
292 6E). Less than 2% of microglial cells expressed YFP at any given time-point analyzed.  
293 LSK were increasingly labelled with >30% of YFP<sup>+</sup> cells at E16.5, reaching >40% at  
294 E18.5 (Fig. 6F). Both CMP and GMP compartments exhibited similar levels of YFP  
295 expression to those in LSK, and the same was observed for Cd11b<sup>+</sup>F4/80<sup>-</sup> monocytes,  
296 consistent with their definitive HSC origin. By contrast, only less than 5% P1+P2 or P3  
297 were labelled with YFP by E16.5 and less than 10% by E18.5. Erythroblasts showed  
298 less than 8% of YFP labelled cells at all analyzed time-points indicating that HSC are  
299 not contributing to mature erythrocytes up until E18.5, the day before birth. MEP  
300 showed a delayed labelling profile with 8% at E16.5 reaching 20% around birth.  
301 Taken together these observations indicated that neither HSC-derived nor any other  
302 Flt3 expressing progenitor contribute significantly to erythropoiesis throughout fetal life  
303 and that the erythrocyte progenitors that sustain fetal erythropoiesis differentiate from  
304 YS-derived EMPs.

305 FL stroma produces Epo, essential for erythrocyte production, albeit at lower  
306 concentrations than kidney, the adult source of Epo (Suzuki *et al.*, 2011). Embryonic  
307 progenitors have been reported to react to lower concentrations of Epo than their adult  
308 counterparts (Rich and Kubanek, 1980). We compared erythrocyte production from P2  
309 of YS origin with that from CD45<sup>+</sup> MEP of HSC origin from the same FL  
310 (Supplementary Fig. 4). HSC-derived MEP were about two-fold less efficient in  
311 generating erythrocytes than YS-derived P2 at limiting levels of Epo and required more  
312 than ten-fold higher concentrations to reach 50% of erythrocyte colony formation.  
313 These results provide experimental evidence for the mechanism controlling the  
314 selection of YS-derived over HSC-derived progenitors in fetal erythropoiesis.

## 315 Discussion

316

317 Here we describe a population of CD45<sup>-</sup>Kit<sup>+</sup> (P1/P2) hematopoietic cells unique  
318 to FL, found from E11.5 up until birth and that, at its peak (around E14.5), represent a  
319 major population comprising more than 70% of the CD45<sup>-</sup>Ter119<sup>-</sup> FL cells and 10-15  
320 % of total FL cells. *In vitro* analysis of their differentiation potential showed that they  
321 give rise to erythroid colonies (50-70%) at higher frequencies than adult BM MEPs  
322 (~15%) (Akashi *et al.*, 2000). The majority of CD45<sup>-</sup>Kit<sup>+</sup> cells express CD24, a marker  
323 found in immature hematopoietic and other cell types and mature erythrocytes, and  
324 up-regulated concomitantly with CD71, the transferrin receptor, a marker only found  
325 in erythroid progenitors (Dong *et al.*, 2011).

326 Gene expression analysis and *in vitro* assays indicated a developmental  
327 progression where P1 cells further develop into P2 and later into P3 cells before  
328 acquisition of Ter119 expression. Both P1 and P2 cells contained high frequency of  
329 CFU-E and had increasing expression of the erythroid genes *Gata1* and *Epor*. By  
330 contrast, P3 cells did not generate colonies *in vitro* and expressed the erythroid  
331 transcripts *Gata1*, *Lmo2*, *Klf1* and *Epor* at levels similar to Ter119<sup>+</sup> cells, stage at  
332 which they also express *Hbb-b1*, low levels of *Hbb-bh1* and undetectable *Hbb-y*  
333 transcripts, indicating they are within the definitive erythroid lineage. Of notice, P1 cells  
334 are among the most actively proliferative FL progenitors indicating that they can  
335 considerably expand before terminal differentiation.

336 Definitive HSC and their progeny are dependent on the transcription factor *c-*  
337 *Myb* whereas primitive YS-derived erythrocytes, megakaryocytes (Tober *et al.*, 2008)  
338 and tissue-resident macrophages (Schulz *et al.*, 2012) are *c-Myb* independent. Ter119<sup>+</sup>  
339 cells were drastically decreased in the FL of *c-Myb* mutants and P1 cells were  
340 undetectable. By comparison, the CD45<sup>+</sup> cells present in the FL of *c-Myb* mutants  
341 representing tissue resident macrophages were not affected (Schulz *et al.*, 2012).  
342 Ter119<sup>+</sup> cells in the *c-Myb*<sup>-/-</sup> FL expressed embryonic globins ( $\epsilon\gamma$  and  $\beta h1$ ), consistent  
343 with their primitive origin and do not express *Klf1*, a transcriptional activator of the  $\beta$ -  
344 globin promoter essential for the transition from expression of embryonic to adult  
345 hemoglobin (Perkins *et al.*, 1995, 2016). Erythroid transcripts were not detected in *c-Myb*<sup>-</sup>  
346 <sup>-</sup> TER119<sup>-</sup>CD24<sup>+</sup> or CD24<sup>-</sup> cells indicating that no definitive erythropoiesis developed  
347 in these mutants. Previous studies reported that *c-Myb* mutations affected both

348 embryonic erythropoiesis and HSC progeny, which was taken as evidence for the HSC  
349 origin of embryonic erythrocytes. However, c-Myb induces proliferation of erythroid  
350 progenitors and therefore HSC-independent erythroid cells can also be affected by c-  
351 *Myb* mutations (Vegiopoulos *et al.*, 2006).

352 It was previously shown that YS-derived EMP transplanted in adult recipient  
353 mice persist for around 20 days reflecting the half-life of erythrocytes *in vivo* (McGrath  
354 *et al.*, 2015a). These experiments however do not evaluate the relative contribution of  
355 EMPs and HSCs to erythropoiesis in an unperturbed environment.

356 Single injections of OH-TAM at E8.5 in *Csf1r*<sup>MeriCreMer</sup>*Rosa26*<sup>YFP</sup> mark  
357 exclusively YS-derived cells and their progeny, among which is the microglia (Gomez  
358 Perdiguero *et al.*, 2015). In these mice P1 and P2 cells are marked at levels similar to  
359 the microglia, three days after OH-TAM, indicating they are the progeny of YS EMPs.  
360 Consistent with the lineage relationship previously established, the frequency of  
361 labelled P1/P2 cells decreased with time after injection whereas the frequency of  
362 labelled erythrocytes increased. EMPs emerge in the YS between E8.5-10.5 and an  
363 injection of OH-TAM at E8.5 will lead to the highest circulating levels of the drug 6  
364 hours later, rapidly decreasing thereafter (Zovein *et al.*, 2008) leading to the labelling of  
365 only a fraction of EMP. EMPs differentiating into any myeloid progeny at the time of  
366 injection will maintain expression of *Csf1r* and will be labelled with YFP. By contrast,  
367 differentiation into erythroid progenitors that expand and progress to erythroblasts lose  
368 *Csf1r* expression throughout, thus explaining the decreasing frequency of labelled  
369 immature erythroid progenitors with time. We have demonstrated by intraembryonic  
370 injections that P2 cells rapidly differentiate into *Ter119*<sup>+</sup> circulating RBC.

371 A kinetics that mirror images the one described above is found in  
372 *Flt3*<sup>Cre</sup>*Rosa26*<sup>YFP</sup> mice where *Flt3* expressing cells and their progeny are permanently  
373 labelled with YFP. By E16.5, where equivalent frequencies of LSK, CMP, GMP and  
374 *CD11b*<sup>+</sup> monocytes are YFP<sup>+</sup>, only a small frequency of erythroid progenitors including  
375 MEP and virtually undetectable frequencies of P3 or erythroblasts are labelled. By  
376 E18.5 MEP were labelled at similar levels to those of CMP and monocytes although  
377 the erythroblast compartment still shows a modest contribution of *Flt3* expressing  
378 progenitors. Because lymphoid progenitors persistently express *Flt3* after commitment  
379 they are the highest labelled population in this model and were excluded from the  
380 analysis. It has been recently described that megakaryocyte/erythrocyte progenitors

381 can bypass the stage of Flt3 expressing MPP and would therefore be undetected in  
382 this model, although no FL counterpart has been reported (Carrelha *et al.*, 2018).  
383 However, less than 5% of CD150<sup>+</sup>CD48<sup>-</sup>HSC appear to adopt this behavior, a low  
384 frequency that will not impact our conclusions. In addition, in adult Flt3-Cre YFP mice  
385 the frequencies of YFP labelled erythroid progenitors is similar to that of all other HSC-  
386 derived lineages indicating this is a suitable model to analyze the erythroid lineage  
387 (Boyer *et al.*, 2011; Buza-Vidas *et al.*, 2011; Gomez Perdiguero *et al.*, 2015).

388 HSC in FL expand but also differentiate giving rise to multilineage progeny that  
389 comprise CMP, GMP, and lymphoid progenitors. However, our data shows that  
390 despite a rapid differentiation of FL HSC, they do not contribute significantly to the  
391 erythroid compartment before birth and therefore *in vivo* embryonic HSC differentiation  
392 is skewed (Supplementary Fig. 5). The FL stromal microenvironment can sustain  
393 erythropoiesis and FL HSC can differentiate into erythrocytes *in vitro*. We show that  
394 the low levels of Epo available in FL before the kidney is competent to produce adult  
395 levels of this hormone modulate the differentiation pattern of HSC that do not produce  
396 MEP and do not contribute to erythropoiesis (Zanjani *et al.*, 1981). Large numbers of  
397 expanding YS-derived erythrocyte progenitors efficiently outcompete HSC progeny in  
398 an environment where resources for erythroid differentiation are limiting.

399 These results reinforce the notion that in contrast to what has been accepted,  
400 YS hematopoiesis is not only devoted to providing oxygen to the embryo before HSCs  
401 differentiate in FL (Supplementary Fig. 5) but rather sustain embryonic survival until  
402 birth. A recent report analyzing human fetal liver hematopoiesis indicates that all cells  
403 in the erythrocyte lineage, similar to the observation in the mouse reported here, do  
404 not express CD45 at stages ranging from 7-17 weeks post conception (Popescu *et al.*,  
405 2019). These observations suggest that fetal erythropoiesis originates in the YS, also  
406 in humans and will impact our understanding of embryonic hematopoiesis in general  
407 and in the pathogenesis of infant erythrocyte abnormalities.

## 408 **Materials and Methods**

409

### 410 **Mice**

411 C57BL/6J mice were purchased from Envigo, Ubiquitin–GFP (Schaefer *et al.*, 2001)  
412 mice used for transplantation experiments were a kind gift from P. Bousso (Pasteur  
413 Institute) Myb<sup>-/-</sup>, Csf1r<sup>MeriCreMer</sup>, Flt3<sup>Cre</sup> and Rosa26<sup>YFP</sup> mice have been previously  
414 described (Gomez Perdiguero *et al.*, 2015). 6-8-week-old mice or timed pregnant females  
415 were used. Timed-pregnancies were generated after overnight mating, the following  
416 morning females with vaginal plug were considered to be at E0.5. Recombination in  
417 Csf1r<sup>MeriCreMer</sup>Rosa26<sup>YFP</sup> was induced by single injection at E8.5 of 75 µg per g (body  
418 weight) of 4-hydroxytamoxifen OH-TAM (Sigma), supplemented with 37.5 µg per g  
419 (body weight) progesterone (Sigma) as described (Gomez Perdiguero *et al.*, 2015).

420 All animal manipulations were performed according to the ethic charter approved by  
421 French Agriculture ministry and to the European Parliament Directive 2010/63/EU.

422

### 423 **Cell suspension**

424 E11.5-E18.5 fetal livers (FL) were dissected under a binocular magnifying lens. FLs  
425 were recovered in Hanks' balanced-salt solution (HBSS) supplemented with 1% fetal  
426 calf serum (FCS) (Gibco) and passed through a 26-gauge needle of a 1-ml syringe to  
427 obtain single-cell suspensions. Before staining, cell suspensions were filtered with a  
428 100 µm cell strainer (BD).

429

### 430 **Flow cytometry and cell sorting**

431 For sorting, FL were depleted (Ter119<sup>+</sup>CD45<sup>+</sup>) using MACS Columns (Miltenyi Biotec).  
432 Cell suspensions were stained for 20-30 min at 4°C in the dark with antibodies listed  
433 in Supplementary Table 2. Biotinylated antibodies were detected by incubation for 15  
434 min at 4°C in the dark with streptavidin. Antibodies to lineage markers included anti-  
435 Ter119, anti-Gr1, anti-CD19, anti-CD3, anti-CD4, and anti-CD8, anti-NK1.1, anti-Il7r,  
436 anti-TCR $\alpha\beta$ , anti-TCR $\gamma\delta$  and anti-CD11c (all identified in Supplementary Table 2).  
437 Stained cells were analyzed on a custom BD LSR Fortessa or BD FACSymphony and  
438 were sorted with a BD FACSAria III (BD Biosciences) according to the guidelines for  
439 the use of flow cytometry and cell sorting (Cossarizza *et al.*, 2019). Data were analyzed

440 with FlowJo software (v.10.5.3, BD Biosciences) or R packages as described in  
441 “Bioinformatic Analysis”.

442

### 443 **RNA-sequencing and analysis**

444 Total RNA from sorted E14.5 FL cells was extracted using the RNeasy Micro kit  
445 (Qiagen) following manufacturer instructions and rRNA sequences were eliminated by  
446 enzymatic treatment (Zap R, Clontech). cDNA libraries were generated using the  
447 SMARTer Stranded Total RNA-Seq Kit – Pico Input Mammalian (Clontech). The single  
448 read RNA-seq reads were aligned to the mouse reference genome GRCm38 using  
449 STAR. Number of reads aligned to genes were counted using FeatureCounts (Liao *et*  
450 *al.*, 2014). The R package DESeq2 (Love *et al.*, 2014) was used to normalize reads and  
451 identify differentially expressed genes with statistical significance using the negative  
452 binomial test ( $p < 0.05$ , Benjamini-Hochberg correction).

453 Enrichr was used to perform gene-set enrichment analysis of the highly differentially  
454 expressed genes in P2 vs CD324<sup>+</sup> cells (>2-fold differential expression) (Chen *et al.*,  
455 2013). Top 10 terms from the Gene Ontology Biological Process 2018 and ARCHS4  
456 Tissues were retrieved. Expression datasets are available in NCBI Gene Expression  
457 Omnibus under Accession Number GSE138960.

458

### 459 **Gene expression by RT-PCR**

460 Cells were sorted directly into lysis buffer and mRNA was extracted (RNeasy Micro Kit  
461 (Qiagen), reverse-transcribed (PrimeScript RT Reagent Kit (Takara Bio), and  
462 quantitative PCR with Power SYBR Green PCR Master Mix (Applied Biosystems)(see  
463 Supplementary Table 3 for primers). qPCR reactions were performed on a  
464 Quantstudio3 thermocycler (Applied Biosystems), gene expression was normalized to  
465 that of  $\beta$ -actin and relative expression was calculated using the  $2^{-\Delta Ct}$  method.

466

### 467 **Imaging Flow Cytometry Analysis**

468 E13.5 FL cells were stained with the surface markers CD45 BV605 (1:50 dilution),  
469 Ter119 Biotin (1:100 dilution) followed by incubation with Streptavidin PE-Cy7 (1:100  
470 dilution), CD71 PE (1:100 dilution), CD24 BV510 (1:50 dilution) and Kit Pacific Blue  
471 (1:20 dilution) and the RNA Dye Thiazole Orange (TO). Prior to acquisition, nuclei  
472 were stained with 20  $\mu$ M DRAQ5 (Biostatus) and filtered with 100  $\mu$ m mesh. Data



473 acquisition was performed using an ImageStream<sup>x</sup> Mark II Imaging Flow Cytometer  
474 (Amnis, Luminex Corporation) using 405 nm, 488 nm, 561 nm and 642 nm excitation  
475 lasers and the 40× magnification collection optic. Laser powers were set in order to  
476 maximize signal resolution but minimize any saturation of the CCD camera with bright-  
477 field images collected in channels 1 and 9. A minimum of 100,000 cell events were  
478 collected per sample. In order to calculate spectral compensation, single-stained cells  
479 were acquired with the bright-field illumination turned off. Spectral compensation and  
480 data analysis were performed using the IDEAS analysis software (v.6.2.64, Luminex  
481 Corp).

482

### 483 **EdU incorporation and cell cycle analysis**

484 EdU detection was done using the Click-iT EdU Pacific Blue flow cytometry assay kit  
485 (Invitrogen). Cell cycle was analyzed after fixation with Fixation/Permeabilization kit  
486 (eBioscience™) and staining with Ki67. DAPI (4,6-diamidino-2-phenylindole) was  
487 added 7 min before analysis.

488

### 489 ***In vitro* liquid and semi-solid cultures**

490 For limiting dilution analysis sorted cells were plated in 1:3 diluting densities starting  
491 at 27 cells/well until 1 cell/well in complete medium OPTI-MEM with 10% FCS,  
492 penicillin (50 units/ml), streptomycin (50 µg/ml) and β-mercaptoethanol (50 µM)  
493 supplemented with a saturating amount of the following cytokines: macrophage  
494 colony-stimulating factor (M-CSF), granulocyte-macrophage colony-stimulating factor  
495 (GM-CSF), c-Kit ligand (Kitl), Erythropoietin (Epo) (R&D Systems) and  
496 Thrombopoietin (Tpo) (R&D Systems) for myeloid and erythroid differentiation. Except  
497 stated otherwise, cytokines were obtained from the supernatant of myeloma cell lines  
498 (provided by F. Melchers) transfected with cDNA encoding those cytokines. After 5-7  
499 days wells were assessed for the presence of hematopoietic colonies. Cell  
500 frequencies, determined with ELDA software ('extreme limiting-dilution analysis') from  
501 the Walter and Eliza Hall Institute Bioinformatics Division, are presented as the  
502 number of positive wells and the number of total tested wells (Hu and Smyth, 2009).

503 For colony forming assays sorted cells were plated at 100 cells/35 mm culture dishes  
504 in duplicates in Methocult M3434 as described by the manufacturer. CFU-E were  
505 assessed at 3 days and remaining colonies at 7 days.

506

### 507 ***In vivo* analysis of lineage potential**

508 E13.5 GFP<sup>+</sup> Kit<sup>+</sup>CD24<sup>+</sup> or CD45<sup>+</sup>LK FL cells from UBC-GFP embryos were purified  
509 and injected intraperitoneally into recipient E13.5 WT embryos (20000 cells/embryo)  
510 of anesthetized females and FL and fetal blood were analyzed at E16.5.

511

### 512 **Multiplex single-cell qPCR**

513 Single cells were sorted directly into 96-well plates loaded with RT-STA Reaction mix  
514 (CellsDirect™ One-Step qRT-PCR Kit, Invitrogen, according to the manufacturer's  
515 procedures) and 0.2x specific TaqMan® Assay mix (see Supplementary Table 4 for  
516 the TaqMan® assays list) and were kept at -80 °C at least overnight. For each subset  
517 analyzed, a control-well with 20 cells was also sorted. Pre-amplified cDNA (20 cycles)  
518 was obtained according to manufacturer's note and was diluted 1:5 in TE buffer for  
519 qPCR. Multiplex qPCR was performed using the microfluidics Biomark HD system for  
520 40 cycles (Fluidigm) as previously described (Chea *et al.*, 2016). The same TaqMan  
521 probes were used for both RT/pre-amp and qPCR. Only single cells for which at least  
522 2 housekeeping genes could be detected before 20 cycles were included in the  
523 analysis.

524

### 525 **Bioinformatic Analysis.**

526 Flow cytometry data analysis was performed in FCS files of live CD45-Ter119- cell  
527 fraction using R packages "Rtsne", "Rphenograph" and "pheatmap" using Rv3.5.0.  
528 Gene expression raw data (BioMark™, Fluidigm) of single cells was normalized with  
529 Gapdh and β-actin. Heatmaps and hierarchical clustering were generated using R  
530 packages "pheatmap" and "Rphenograph" (Levine *et al.*, 2015).

531

### 532 **Quantification and Statistical Analysis**

533 All results are shown as mean ± standard deviation (SD). Statistical significance was  
534 determined using one-way ANOVA followed by Tukey multiple comparison test where  
535 a P value of <0.05 was considered significant and a P value >0.05 was considered not  
536 significant.

537

538

539 **Acknowledgements**

540 We thank J. Palis, A. Bandeira, P. Vieira and P. Pereira and the members of P.P.O.  
541 and A.C. laboratories for critical discussions, M. Petit for help in bioinformatic analysis.  
542 We thank P. Bousso for the ubiquitin-GFP reporter mice; S. Novault, S. Megharba, S.  
543 Schmutz, V. Libri and T. Stephen from the Center for Translational Science (CRT) –  
544 Cytometry and Biomarkers Unit of Technology and Service (CB UTechS) at Institut  
545 Pasteur for technical support; the staff of the animal facility of the Institut Pasteur for  
546 mouse care. This work was financed by the Institut Pasteur, INSERM, ANR (grant  
547 Twothyme) to A.C., REVIVE Future Investment Program and Pasteur-Weizmann  
548 Foundation through grants to A.C., FCT through the grant “PD/BD/114128/2015” to  
549 F.S.S and the grant “FCT-POCI-01-0145-FEDER-032656” to P.P.O..

550

551 **Author Contributions**

552 F.S.S.: Conceived and performed experiments, performed formal analysis, wrote the  
553 manuscript

554 O. B-D.: Performed experiments

555 R. E.: Performed experiments and provided feedback

556 L. I.: Performed experiments

557 L. F.: Performed experiments

558 O. S.: Performed RNA-Seq

559 P. P.Ó.: provided feedback and reviewed the manuscript

560 E. G-P.: provided animals, expertise and feedback, reviewed the manuscript

561 A. C.: Conceived and performed experiments, performed formal analysis, wrote and  
562 reviewed the manuscript, secured funding

563 All authors discussed and interpreted the results.

564

565 **Conflict of interest**

566 The authors declare no competing interests.

567

568 **Data availability**

569 The accession number for the RNA-seq data reported in this paper is GSE138960.

570 For original data, please contact [ana.cumano@pasteur.fr](mailto:ana.cumano@pasteur.fr)

571

## 572 References

- 573 Aisen P (2004) Transferrin receptor 1. *Int J Biochem Cell Biol*, **36**: 2137–2143
- 574 Akashi K, Traver D, Miyamoto T, Weissman IL (2000) A clonogenic common myeloid  
575 progenitor that gives rise to all myeloid lineages. *Nature*, **404**: 193–197
- 576 Beaudin AE, Boyer SW, Perez-Cunningham J, Hernandez GE, Derderian SC, Jujjavarapu C,  
577 Aaserude E, MacKenzie T, Forsberg EC (2016) A Transient Developmental  
578 Hematopoietic Stem Cell Gives Rise to Innate-like B and T Cells. *Cell Stem Cell*, **19**:  
579 768–783
- 580 Benz C, Martins VC, Radtke F, Bleul CC (2008) The stream of precursors that colonizes the  
581 thymus proceeds selectively through the early T lineage precursor stage of T cell  
582 development. *J Exp Med*, **205**: 1187–1199
- 583 Bertrand JY, Chi NC, Santoso B, Teng S, Stainier DY, Traver D (2010) Haematopoietic stem  
584 cells derive directly from aortic endothelium during development. *Nature*, **464**: 108–  
585 111
- 586 Bertrand JY, Jalil A, Klaine M, Jung S, Cumano A, Godin I (2005) Three pathways to mature  
587 macrophages in the early mouse yolk sac. *Blood*, **106**: 3004–3011
- 588 Boyer SW, Schroeder AV, Smith-Berdan S, Forsberg EC (2011) All hematopoietic cells  
589 develop from hematopoietic stem cells through Flk2/Flt3-positive progenitor cells. *Cell*  
590 *Stem Cell*, **9**: 64–73
- 591 Buza-Vidas N, Woll P, Hultquist A, Duarte S, Lutteropp M, Bouriez-Jones T, Ferry H, Luc  
592 S, Jacobsen SE (2011) FLT3 expression initiates in fully multipotent mouse  
593 hematopoietic progenitor cells. *Blood*, **118**: 1544–1548
- 594 Carrelha J et al. (2018) Hierarchically related lineage-restricted fates of multipotent  
595 haematopoietic stem cells. *Nature*, **554**: 106–111
- 596 Chea S, Schmutz S, Berthault C, Perchet T, Petit M, Burlen-Defranoux O, Goldrath AW,  
597 Rodewald H-R, Cumano A, Golub R (2016) Single-Cell Gene Expression Analyses  
598 Reveal Heterogeneous Responsiveness of Fetal Innate Lymphoid Progenitors to Notch  
599 Signaling. *Cell Reports*  
600 *Cell Rep*, **14**: 1500–1516
- 601 Chen EY, Tan CM, Kou Y, Duan Q, Wang Z, Meirelles GV, Clark NR, Ma'ayan A (2013)  
602 Enrichr: interactive and collaborative HTML5 gene list enrichment analysis tool. *BMC*  
603 *Bioinformatics*, **14**: 128
- 604 Chen K, Liu J, Heck S, Chasis JA, An X, Mohandas N (2009) Resolving the distinct stages in  
605 erythroid differentiation based on dynamic changes in membrane protein expression  
606 during erythropoiesis. *Proc Natl Acad Sci U S A*, **106**: 17413–17418
- 607 Chen MJ, Li Y, De Obaldia ME, Yang Q, Yzaguirre AD, Yamada-Inagawa T, Vink CS,  
608 Bhandoola A, Dzierzak E, Speck NA (2011) Erythroid/myeloid progenitors and  
609 hematopoietic stem cells originate from distinct populations of endothelial cells. *Cell*  
610 *Stem Cell*, **9**: 541–552
- 611 Cossarizza A et al. (2019) Guidelines for the use of flow cytometry and cell sorting in  
612 immunological studies (second edition). *Eur J Immunol*, **49**: 1457–1973
- 613 Cumano A, Dieterlen-Lievre F, Godin I (1996) Lymphoid potential, probed before  
614 circulation in mouse, is restricted to caudal intraembryonic splanchnopleura. *Cell*, **86**:  
615 907–916
- 616 de Bruijn MF, Speck NA, Peeters MC, Dzierzak E (2000) Definitive hematopoietic stem  
617 cells first develop within the major arterial regions of the mouse embryo. *EMBO J*, **19**:  
618 2465–2474
- 619 Dong HY, Wilkes S, Yang H (2011) CD71 is selectively and ubiquitously expressed at high  
620 levels in erythroid precursors of all maturation stages: a comparative immunochemical  
621 study with glycophorin A and hemoglobin A. *Am J Surg Pathol*, **35**: 723–732

- 622 Frame JM, Fegan KH, Conway SJ, McGrath KE, Palis J (2016) Definitive Hematopoiesis in  
623 the Yolk Sac Emerges from Wnt-Responsive Hemogenic Endothelium Independently  
624 of Circulation and Arterial Identity. *Stem Cells*, **34**: 431–444
- 625 Fraser ST, Isern J, Baron MH (2007) Maturation and enucleation of primitive erythroblasts  
626 during mouse embryogenesis is accompanied by changes in cell-surface antigen  
627 expression. *Blood*, **109**: 343–352
- 628 Gentek R, Ghigo C, Hoeffel G, Bulle MJ, Msallam R, Gautier G, Launay P, Chen J, Ginhoux  
629 F, Bajénoff M (2018) Hemogenic Endothelial Fate Mapping Reveals Dual  
630 Developmental Origin of Mast Cells. *Immunity*, **48**: 1160–1171.e5
- 631 Gomez Perdiguero E et al. (2015) Tissue-resident macrophages originate from yolk-sac-  
632 derived erythro-myeloid progenitors. *Nature*, **518**: 547–551
- 633 Hu Y, Smyth GK (2009) ELDA: Extreme limiting dilution analysis for comparing depleted  
634 and enriched populations in stem cell and other assays. *Journal of Immunological  
635 Methods*, **347**: 70–78
- 636 Kasaai B, Caolo V, Peacock HM, Lehoux S, Gomez-Perdiguero E, Luttun A, Jones EA  
637 (2017) Erythro-myeloid progenitors can differentiate from endothelial cells and  
638 modulate embryonic vascular remodeling. *Sci Rep*, **7**: 43817
- 639 Kieusseian A, Brunet de la Grange P, Burlen-Defranoux O, Godin I, Cumano A (2012)  
640 Immature hematopoietic stem cells undergo maturation in the fetal liver. *Development*,  
641 **139**: 3521–3530
- 642 Kina T, Ikuta K, Takayama E, Wada K, Majumdar AS, Weissman IL, Katsura Y (2000) The  
643 monoclonal antibody TER-119 recognizes a molecule associated with glycoprotein A  
644 and specifically marks the late stages of murine erythroid lineage. *Br J Haematol*, **109**:  
645 280–287
- 646 Kingsley PD, Malik J, Emerson RL, Bushnell TP, McGrath KE, Bloedorn LA, Bulger M,  
647 Palis J (2006) “Maturational” globin switching in primary primitive erythroid cells.  
648 *Blood*, **107**: 1665–1672
- 649 Kissa K, Herbomel P (2010) Blood stem cells emerge from aortic endothelium by a novel  
650 type of cell transition. *Nature*, **464**: 112–115
- 651 Kozhemyakina E, Ionescu A, Lassar AB (2014) GATA6 is a crucial regulator of Shh in the  
652 limb bud. *PLoS Genet*, **10**: e1004072
- 653 Levine JH et al. (2015) Data-Driven Phenotypic Dissection of AML Reveals Progenitor-like  
654 Cells that Correlate with Prognosis. *Cell*, **162**: 184–197
- 655 Liao Y, Smyth GK, Shi W (2014) featureCounts: an efficient general purpose program for  
656 assigning sequence reads to genomic features. *Bioinformatics*, **30**: 923–930
- 657 Love MI, Huber W, Anders S (2014) Moderated estimation of fold change and dispersion for  
658 RNA-seq data with DESeq2. *Genome Biol*, **15**: 550
- 659 McGrath KE, Catherman SC, Palis J (2017) Delineating stages of erythropoiesis using  
660 imaging flow cytometry. *Methods*, **112**: 68–74
- 661 McGrath KE, Frame JM, Fegan KH, Bowen JR, Conway SJ, Catherman SC, Kingsley PD,  
662 Koniski AD, Palis J (2015a) Distinct Sources of Hematopoietic Progenitors Emerge  
663 before HSCs and Provide Functional Blood Cells in the Mammalian Embryo. *Cell Rep*,  
664 **11**: 1892–1904
- 665 McGrath KE, Frame JM, Fromm GJ, Koniski AD, Kingsley PD, Little J, Bulger M, Palis J  
666 (2011) A transient definitive erythroid lineage with unique regulation of the  $\beta$ -globin  
667 locus in the mammalian embryo. *Blood*, **117**: 4600–4608
- 668 McGrath KE, Frame JM, Palis J (2015b) Early hematopoiesis and macrophage development.  
669 *Semin Immunol*, **27**: 379–387

- 670 Mucenski ML, McLain K, Kier AB, Swerdlow SH, Schreiner CM, Miller TA, Pietryga DW,  
671 Scott WJ, Potter SS (1991) A functional c-myb gene is required for normal murine fetal  
672 hepatic hematopoiesis. *Cell*, **65**: 677–689
- 673 Otsuka H, Takito J, Endo Y, Yagi H, Soeta S, Yanagisawa N, Nonaka N, Nakamura M  
674 (2016) The expression of embryonic globin mRNA in a severely anemic mouse model  
675 induced by treatment with nitrogen-containing bisphosphonate. *BMC Hematol*, **16**: 4
- 676 Palis J (2016) Hematopoietic stem cell-independent hematopoiesis: emergence of erythroid,  
677 megakaryocyte, and myeloid potential in the mammalian embryo. *FEBS Lett*, **590**:  
678 3965–3974
- 679 Palis J, Robertson S, Kennedy M, Wall C, Keller G (1999) Development of erythroid and  
680 myeloid progenitors in the yolk sac and embryo proper of the mouse. *Development*,  
681 **126**: 5073–5084
- 682 Perkins A, Xu X, Higgs DR, Patrinos GP, Arnaud L, Bieker JJ, Philipsen S, KLF1 CW  
683 (2016) Krüppeling erythropoiesis: an unexpected broad spectrum of human red blood  
684 cell disorders due to KLF1 variants. *Blood*, **127**: 1856–1862
- 685 Perkins AC, Sharpe AH, Orkin SH (1995) Lethal beta-thalassaemia in mice lacking the  
686 erythroid CACCC-transcription factor EKLF. *Nature*, **375**: 318–322
- 687 Popescu DM et al. (2019) Decoding human fetal liver haematopoiesis. *Nature*, **574**: 365–371
- 688 Ratajczak MZ, Perrotti D, Melotti P, Powzaniuk M, Calabretta B, Onodera K, Kregenow DA,  
689 Machalinski B, Gewirtz AM (1998) Myb and ets proteins are candidate regulators of c-  
690 kit expression in human hematopoietic cells. *Blood*, **91**: 1934–1946
- 691 Rich IN, Kubanek B (1980) The ontogeny of erythropoiesis in the mouse detected by the  
692 erythroid colony-forming technique. II. Transition in erythropoietin sensitivity during  
693 development. *J Embryol Exp Morphol*, **58**: 143–155
- 694 Schaefer BC, Schaefer ML, Kappler JW, Marrack P, Kedl RM (2001) Observation of  
695 antigen-dependent CD8<sup>+</sup> T-cell/ dendritic cell interactions in vivo. *Cell Immunol*, **214**:  
696 110–122
- 697 Schulz C et al. (2012) A lineage of myeloid cells independent of Myb and hematopoietic  
698 stem cells. *Science*, **336**: 86–90
- 699 Suzuki N, Obara N, Pan X, Watanabe M, Jishage K, Minegishi N, Yamamoto M (2011)  
700 Specific contribution of the erythropoietin gene 3' enhancer to hepatic erythropoiesis  
701 after late embryonic stages. *Mol Cell Biol*, **31**: 3896–3905
- 702 Taoudi S, Gonneau C, Moore K, Sheridan JM, Blackburn CC, Taylor E, Medvinsky A (2008)  
703 Extensive hematopoietic stem cell generation in the AGM region via maturation of VE-  
704 cadherin+CD45<sup>+</sup> pre-definitive HSCs. *Cell Stem Cell*, **3**: 99–108
- 705 Tober J, McGrath KE, Palis J (2008) Primitive erythropoiesis and megakaryopoiesis in the  
706 yolk sac are independent of c-myb. *Blood*, **111**: 2636–2639
- 707 Vegiopoulos A, García P, Emambokus N, Frampton J (2006) Coordination of erythropoiesis  
708 by the transcription factor c-Myb. *Blood*, **107**: 4703–4710
- 709 Wang Q et al. (1996) The CBFbeta subunit is essential for CBFalpha2 (AML1) function in  
710 vivo. *Cell*, **87**: 697–708
- 711 Zanjani ED, Ascensao JL, McGlave PB, Banisadre M, Ash RC (1981) Studies on the liver to  
712 kidney switch of erythropoietin production. *J Clin Invest*, **67**: 1183–1188
- 713 Zovein AC et al. (2008) Fate tracing reveals the endothelial origin of hematopoietic stem  
714 cells. *Cell Stem Cell*, **3**: 625–636
- 715
- 716

717

## 718 **Figure Titles and Legends**

719 **Figure 1. A population of Kit<sup>+</sup> cells unique to FL represents the majority of**  
720 **Ter119<sup>-</sup>CD45<sup>-</sup> cells**

721 **(A)** tSNE analysis and hierarchical clustering of flow cytometry data of Ter119<sup>-</sup>CD45<sup>-</sup>  
722 cells from E14.5 fetal livers stained with the surface markers CD31 (endothelial cells),  
723 CD324 (epithelial cells, hepatoblasts), Kit and CD24. **(B)** Representative FACS plots  
724 of the clusters identified in **(A)** using the same color code. **(C)** Representative FACS  
725 plots of TER119<sup>-</sup>CD45<sup>-</sup> cells from E12.5 and E18.5 regarding Kit and CD24 expression  
726 and **(D)** corresponding cell numbers at different stages. **(E)** Phenotype of viable Lin<sup>-</sup>  
727 (the lineage cocktail contains Ter119, Gr-1, CD19, CD3, CD4, CD8, Nk1.1, Il7r,  
728 TCR $\alpha\beta$ , TCR $\gamma\delta$  and Cd11c for BM and Ter119, Gr-1, CD19, Nk1.1, Il7r for E12.5 fetal  
729 liver) E12.5 FL and BM cells using Kit and Sca1. **(F)** Histogram of CD45 expression in  
730 Lin<sup>-</sup>Kit<sup>+</sup>Sca1<sup>-</sup> (LK) and Lin<sup>-</sup>Kit<sup>+</sup>Sca1<sup>+</sup> (LSK) cells from E12.5 FL and adult BM. (E11.5  
731 n= 6, E12.5 n=17, E14.5 n=4, E16.5 n=8, E18.5 n=2). See also Supplementary Fig. 1.

732

733 **Figure 2. P1 and P2 cells in the FL have an erythroid progenitor transcriptional**  
734 **signature**

735 **(A)** CD31<sup>+</sup>, P2 and CD324<sup>+</sup> cells from E14.5 FL were sorted and subjected to RNA  
736 sequencing. Differentially expressed genes are represented as heatmap and most  
737 expressed genes are listed (n=3 independent litters). **(B)** Gene set enrichment  
738 analysis on genes with more than two-fold difference in expression level between P2  
739 and CD324<sup>+</sup> cells using *Enrichr* web-application; top 10 significantly associated GO  
740 Biological Processes and ARCHS4 Tissues are shown. Top biological process is  
741 erythrocyte differentiation (q-value <1.0e<sup>-6</sup>; Gene Ontology term GO:0030218) and top  
742 tissue associated is erythroblast (q-value <1.0e<sup>-14</sup>; ARCHS4 Tissues gene database).  
743 Gene lists available on request. **(C)** E14.5 FL P1, P2, P3 and Ter119<sup>+</sup> cells were sorted  
744 and gene expression of key erythroid genes (Gata1, Lmo2, Klf1, Epor and Bmi1),  
745 progenitor associated genes (*c-Myb* and *Runx3*) and hemoglobins (Hbb-y, Hbb-bh1,  
746 Hbb-b1) was analyzed. QPCR data was analyzed using the delta Ct method and was  
747 normalized with  $\beta$ -actin. Statistical significance was assessed using one-way ANOVA  
748 followed by Tukey's multiple comparison test **(C)** \*p<0.05, \*\*p<0.01, \*\*\*p<0.001,

749 \*\*\*\* $p < 0.0001$ . Data are represented as mean  $\pm$  standard deviation from 3 independent  
750 experiments.

751

752 **Figure 3. P1, P2 and P3 cells represent increasingly maturation stages within the**  
753 **erythroid lineage**

754 **(A)** E13.5 Ter119<sup>-</sup> CD45<sup>-</sup> cells were analyzed by imaging flow cytometry using CD71,  
755 Ter119, Kit, CD24 and CD45 as surface markers, DRAQ5 to label nuclei and Thiazole  
756 Orange (TO) to label RNA. Representative images of P1, P2 and P3 cells. **(B)**  
757 Expression of CD71 and Ter119 was assessed in P1, P2 and P3 cells and plotted as  
758 a histogram. **(C)** Experimental design of cell cycle analysis using EdU labelling. E12.5  
759 or E13.5 pregnant mice were injected intraperitoneally with 100  $\mu$ g of EdU at 0h, 8h  
760 and 16h. Fetal livers were collected 2h after the last injection and EdU expression was  
761 analyzed on Ter119<sup>-</sup>CD45<sup>-</sup>CD54<sup>-</sup>CD31<sup>-</sup> cells using the indicated gates **(D)**. **(E)**  
762 Percentages of EdU incorporation in P1, P2 and P3 cells at E13.5 and E14.5 (n=3).  
763 **(F)** Cell cycle analysis of E14.5 fetal liver cells using Ki-67 and DAPI. Statistical  
764 significance was assessed using one-way ANOVA followed by Tukey's multiple  
765 comparison test **(C)** \* $p < 0.05$ , \*\* $p < 0.01$ , \*\*\* $p < 0.001$ , \*\*\*\* $p < 0.0001$ . Data are  
766 represented as mean  $\pm$  standard deviation from 3 independent experiments.

767

768 **Figure 4. P2 and P3 cells are committed erythroid progenitors whereas P1 retain**  
769 **residual myeloid potential**

770 **(A)** Frequencies of colony forming cells in P1, P2, P3 and Lin<sup>-</sup> CD45<sup>+</sup> Kit<sup>+</sup> (LK) cells  
771 from E13.5 FL (n= 288 wells from 3 independent experiments of each population).  
772 **(B)** *In vitro* lineage potential of E13.5 P1, P2, P3 and LK cells in semi-solid cultures.  
773 CFU-E colonies were quantified at 3 days and BFU-E, CFU-M, CFU-G, CFU-GM,  
774 CFU-GEMM and CFU-Mk at 7 days of culture (n= 6, 3 independent experiments). **(C)**  
775 Schematic representation of transplantation experiment. E13.5 C57/BL6 pregnant  
776 females were anesthetized, the peritoneal cavity was opened, and the uterus exposed.  
777 Embryos were injected intraperitoneally with 20000 E13.5 GFP<sup>+</sup> purified cells from  
778 UBC-GFP embryos. FL and blood were collected 3 days post-injection. **(D)**  
779 Representative FACS plots showing erythroid contribution of GFP<sup>+</sup> cells in fetal liver  
780 and blood after injection of P2 or LK cells and quantification **(E)** (P2 n=3, LK n=4, 4  
781 independent experiments). Data are represented as mean  $\pm$  standard deviation.

782



783 **Figure 5. P1/P2 progenitors require c-Myb expression**

784 **(A)** Representative FACS plots showing percentages of Ter119 and CD45 (top panel)  
785 and Kit and CD24 (lower panel) expressing cells in *c-Myb*<sup>+/-</sup> and *c-Myb*<sup>-/-</sup> E14.5 FL and  
786 corresponding absolute numbers **(B)**. **(C)** Expression of hemoglobin (*Hbb-b1*, *Hbb-*  
787 *bh1* and *Hbb-y*) and key erythroid genes (*Epor*, *Tal1* and *Klf1*) in CD24<sup>-</sup>, CD24<sup>+</sup> and  
788 Ter119<sup>+</sup> cells were analyzed by qPCR. Statistical significance was assessed using  
789 one-way ANOVA followed by Tukey's multiple comparison test \*p<0.05, \*\*p<0.01,  
790 \*\*\*p<0.001, \*\*\*\*p<0.0001. Data are represented as mean ± standard deviation from 2  
791 independent experiments.

792

793 **Figure 6. P1/P2 cells originated from yolk sac and were major contributors to**  
794 **embryonic erythropoiesis**

795 **(A)** Experimental design for lineage tracing experiments using the  
796 *Csf1r*<sup>MeriCreMer</sup>*Rosa26*<sup>YFP</sup>. Cre recombinase expression was induced in  
797 *Csf1r*<sup>MeriCreMer</sup>*Rosa26*<sup>YFP</sup> pregnant females with a single injection of OH-TAM at E8.5  
798 and embryos were analyzed 3, 4 and 5 days after injection. **(B)** Percentage of YFP+  
799 cells at E11.5, E12.5 and E13.5 after a pulse of OH-TAM at E8.5 (E11.5 n=12, E12.5  
800 n=11, E13.5 n=7). **(C)** Heatmap of single-cell qPCR in sorted cells from *Csf1r*<sup>MeriCreMer</sup>  
801 E13.5 FL pulsed with OH-TAM at E8.5. Each column represents a single-cell and its  
802 color-coded according to YFP expression (YFP<sup>+</sup> vs YFP<sup>-</sup>) and cell type (P1, P2, P3).  
803 Gene expression was normalized to *b-actin* and *Gapdh* and unsupervised hierarchical  
804 clustering was performed. **(D)** Diffusion map of the 3 populations based on single-cell  
805 gene expression. Left panel is color-coded according to cell type and right panel  
806 according to YFP expression. (A total of 87 cells were analyzed). **(E)** Experimental  
807 design for lineage tracing experiments using the *Flt3*<sup>Cre</sup>*Rosa26*<sup>YFP</sup> mice model.  
808 Embryos were analyzed at E16.5 and E18.5. **(F)** Frequency of YFP expressing cells  
809 at E16.5 and E18.5 (E16.5 n=3, E18.5 n=4) in CMPs (Lin<sup>-</sup>c-kit<sup>+</sup>Sca-1<sup>-</sup>Flt3<sup>-</sup>CD71<sup>-</sup>  
810 CD16/32<sup>-</sup>CD34<sup>+</sup>), GMPs (Lin<sup>-</sup>c-kit<sup>+</sup>Sca-1<sup>-</sup>Flt3<sup>-</sup>CD71<sup>-</sup>CD16/32<sup>+</sup>CD34<sup>+</sup>), MEPs (Lin<sup>-</sup>c-  
811 kit<sup>+</sup>Sca-1<sup>-</sup>Flt3<sup>-</sup>CD71<sup>-</sup>CD16/32<sup>-</sup>CD34<sup>-</sup>), P1+P2 (Lin<sup>-</sup>CD45<sup>-</sup>c-kit<sup>+</sup>), P3 (Lin<sup>-</sup>CD45<sup>-</sup>Kit  
812 CD71<sup>+</sup>), erythroblasts (Lin<sup>+</sup>CD71<sup>+</sup>) and monocytes (Lin<sup>-</sup>CD45<sup>+</sup>CD11b<sup>int</sup>F4/80<sup>-</sup>) cells.  
813 Microglia (CD45<sup>+</sup>F4/80<sup>+</sup>CD11b<sup>+</sup>) and LSK (Lin<sup>-</sup>CD45<sup>+</sup>Sca1<sup>+</sup>Kit<sup>+</sup>) cells were used as  
814 controls. See also Supplementary Figs. 2 and 3.

815

## 816 **Supplementary Figure Legends**

817 Supplementary Figure 1. Phenotype of E12.5, E14.5 and E18.5 fetal liver and adult  
818 bone marrow populations (related to Figure 1 and 3)

819 **(A)** Flow cytometry analysis of E12.5, E14.5 and E18.5 fetal liver cells using Ter119,  
820 CD45, E-Cadherin, CD31, CD51 and CD166. Viable Ter119<sup>-</sup>CD45<sup>-</sup>E-Cad<sup>-</sup>CD31<sup>-</sup>  
821 CD51<sup>-</sup>CD166<sup>-</sup> cells can be subdivided into 3 populations according to expression of  
822 CD24 and Kit. **(B)** Flow cytometry profile of E12.5, E14.5 and E18.5 fetal liver Lin<sup>-</sup>  
823 CD45<sup>+</sup>Kit<sup>+</sup> (CD45<sup>+</sup>LK) (blue) and CD45<sup>-</sup>Kit<sup>+</sup> (red) cells according to CD16/32 and  
824 CD34 expression. **(C)** Flow cytometry analysis of CD24 expression in P3 (CD71<sup>+</sup>Kit<sup>-</sup>  
825 ), P2 (CD71<sup>+</sup>Kit<sup>+</sup>) and P1 (CD71<sup>-</sup>Kit<sup>+</sup>) cells in E13.5 FL cells.

826

827 Supplementary Figure 2. Gating strategies used to determine YFP labelled  
828 hematopoietic populations in the Csf1<sup>MeriCreMer</sup>Rosa26<sup>YFP</sup> lineage tracing model  
829 (related to Figure 6)

830 **(A)** Gating strategy for the analysis of YFP expression in Lin<sup>-</sup>Kit<sup>+</sup>Sca1<sup>+</sup> (LSK) cells.

831 **(B)** Gating strategy for the analysis of YFP expression in P1 (Lin<sup>-</sup>CD45<sup>-</sup>Kit<sup>+</sup>CD71<sup>-</sup>) P2  
832 (Lin<sup>-</sup>CD45<sup>-</sup>Kit<sup>+</sup>CD71<sup>+</sup>) cells and P3 (Lin<sup>-</sup>CD45<sup>-</sup>Kit<sup>-</sup>CD71<sup>+</sup>) and erythroblast  
833 (Lin<sup>+</sup>CD71<sup>+</sup>) cells. **(C)** Gating strategy for the analysis of YFP expression in microglia  
834 (CD45<sup>+</sup> F4/80<sup>+</sup> CD11b<sup>+</sup>) cells.

835 Data representative of E12.5 YFP<sup>+</sup> embryos.

836

837 Supplementary Figure 3. Gating strategies used to determine YFP labelled  
838 hematopoietic populations in the Flt3<sup>Cre</sup>Rosa26<sup>YFP</sup> fate-mapping model (related to  
839 Figure 6)

840 **(A)** Gating strategy for the analysis of YFP expression in Lin<sup>-</sup>Kit<sup>+</sup>Sca1<sup>+</sup> (LSK),  
841 Common Myeloid Progenitors (CMP) (Lin<sup>-</sup>Kit<sup>+</sup>Sca1<sup>-</sup>Flt3<sup>-</sup>CD71<sup>-</sup>CD16/32<sup>-</sup>CD34<sup>+</sup>),  
842 Granulocyte-Monocyte Progenitors (GMP) (Lin<sup>-</sup>Kit<sup>+</sup>Sca1<sup>-</sup>Flt3<sup>-</sup> CD71<sup>-</sup>  
843 CD16/32<sup>+</sup>CD34<sup>+</sup>), Megakaryocyte Erythrocyte Progenitors (MEP) (Lin<sup>-</sup>Kit<sup>+</sup>Sca1<sup>-</sup>Flt3<sup>-</sup>  
844 CD71<sup>-</sup>CD16/32<sup>-</sup>CD34<sup>-</sup>), P3 (Lin<sup>-</sup>Kit<sup>-</sup>CD71<sup>+</sup>) and erythroblast (Lin<sup>+</sup>CD71<sup>+</sup>) cells. **(B)**  
845 Gating strategy for the analysis of YFP expression in P1+P2 (Lin<sup>-</sup>CD45<sup>-</sup>Kit<sup>+</sup>) and  
846 monocytes (Lin<sup>-</sup>CD45<sup>+</sup>CD11b<sup>+</sup>F4/80<sup>-</sup>) cells. **(C)** Gating strategy for the analysis of  
847 YFP expression in microglia (CD45<sup>+</sup> F4/80<sup>+</sup> CD11b<sup>+</sup>) cells.

848 Data representative of E16.5 YFP<sup>+</sup> embryos.

849

850 Supplementary Figure 4. Erythroid colony formation in response to erythropoietin  
851 **(A)** Frequency of erythroid colonies in P2 and MEP (CD45<sup>+</sup>) cells from E13.5 FL  
852 using serial dilutions of erythropoietin. Representative plot of 3 independent  
853 experiments. Curves represent the linear regression of the data.

854

855 Supplementary Figure 5. Model of embryonic erythropoiesis

856 **(A)** Erythroid progenitors (P-Ery) are first generated in the yolk sac (E7.5) and give  
857 rise to primitive nucleated erythrocytes, still found in low frequencies at birth. A  
858 second wave of progenitors emerges in the yolk sac (E8.5) as erythromyeloid  
859 progenitor (EMP). EMPs migrate to the FL where they differentiate into highly  
860 proliferative erythroid (CD45<sup>-</sup> Kit<sup>+</sup>) progenitors that sustain erythropoiesis during  
861 embryonic life. Hematopoietic stem cells (HSC) generated in the AGM (E9.5-E11.5)  
862 migrate to the FL where they expand and differentiate into myeloid and lymphoid  
863 lineages. Contribution of HSC to the erythroid lineage is only detected after birth. YS-  
864 derived progenitors respond to lower levels of erythropoietin than their HSC  
865 counterparts and have a selective advantage in FL where erythropoietin levels are  
866 lower than in adult BM.

867 Abbreviations: YS: yolk sac; AGM: aorta-gonads-mesonephros; FL: Fetal Liver; P-  
868 Ery: Primitive Erythroid Progenitors; EMP: Erythromyeloid Progenitors; HSC:  
869 Hematopoietic Stem Cells; Ly: Lymphoid Lineages; My: Myeloid Lineages; Ery:  
870 Erythroid Cells; MEP: Megakaryocyte/Erythrocyte Progenitors.

871

872 **Supplementary Tables**

873 Supplementary Table 1 – List of the 122 genes submitted to Enrichr, related to  
874 Figure 2

875

|                      |                |               |                |                |                |
|----------------------|----------------|---------------|----------------|----------------|----------------|
| <i>A730089K16Rik</i> | <i>Cldn13</i>  | <i>Hk1</i>    | <i>Myb</i>     | <i>Ripk3</i>   | <i>Tifa</i>    |
| <i>Acsl6</i>         | <i>Cnr2</i>    | <i>Hsph1</i>  | <i>Myc</i>     | <i>Rnf17</i>   | <i>Tmc8</i>    |
| <i>Add2</i>          | <i>Cox6b2</i>  | <i>Ikzf1</i>  | <i>Myh7b</i>   | <i>Rpia</i>    | <i>Trem12</i>  |
| <i>Ampd3</i>         | <i>Ctse</i>    | <i>Il1rl1</i> | <i>Mylk3</i>   | <i>Runx3</i>   | <i>Trim58</i>  |
| <i>Ank1</i>          | <i>Def6</i>    | <i>Inpp5d</i> | <i>Nefh</i>    | <i>Sacs</i>    | <i>Trpv2</i>   |
| <i>Apbb1ip</i>       | <i>Dyrk3</i>   | <i>Itga4</i>  | <i>Nxpe4</i>   | <i>Samd14</i>  | <i>Tspan32</i> |
| <i>Arap3</i>         | <i>Epdr1</i>   | <i>Kcnab2</i> | <i>Orc2</i>    | <i>Samsn1</i>  | <i>Tspo2</i>   |
| <i>Arhgap15</i>      | <i>Epor</i>    | <i>Kcng2</i>  | <i>Pcyt1b</i>  | <i>Selplg</i>  | <i>Ubash3a</i> |
| <i>Arhgap9</i>       | <i>Ermap</i>   | <i>Kcnn4</i>  | <i>Pgm1</i>    | <i>Slc14a1</i> | <i>Was</i>     |
| <i>Arhgdig</i>       | <i>Fam132a</i> | <i>Kit</i>    | <i>Plxdc1</i>  | <i>Slc29a1</i> | <i>Ydjc</i>    |
| <i>Atp1b2</i>        | <i>Fam78a</i>  | <i>Klf1</i>   | <i>Pmm1</i>    | <i>Slc2a3</i>  | <i>Zfp239</i>  |
| <i>Bcap29</i>        | <i>Fcho1</i>   | <i>Lgals1</i> | <i>Prkar2b</i> | <i>Slc38a1</i> | <i>Zfp979</i>  |
| <i>Bcl11a</i>        | <i>Fermt3</i>  | <i>Lmo2</i>   | <i>Prps1</i>   | <i>Slc38a5</i> |                |
| <i>Btk</i>           | <i>Gata1</i>   | <i>M1ap</i>   | <i>Prss50</i>  | <i>Slc7a1</i>  |                |
| <i>C2cd4a</i>        | <i>Gcnt1</i>   | <i>Map4k1</i> | <i>Ptpn7</i>   | <i>Slfm3</i>   |                |
| <i>C530008M17Rik</i> | <i>Gdf3</i>    | <i>Mc2r</i>   | <i>Ptprcap</i> | <i>Sowaha</i>  |                |
| <i>Car1</i>          | <i>Gfi1b</i>   | <i>Me2</i>    | <i>Rasal3</i>  | <i>Spire1</i>  |                |
| <i>Casp3</i>         | <i>Gm11427</i> | <i>Meiob</i>  | <i>Rbm43</i>   | <i>Spn</i>     |                |
| <i>Cd37</i>          | <i>Gm13212</i> | <i>Mfng</i>   | <i>Recql4</i>  | <i>Sppl2b</i>  |                |
| <i>Ces2g</i>         | <i>Gm15559</i> | <i>Mfsd2b</i> | <i>Rgs10</i>   | <i>Tal1</i>    |                |
| <i>Chst11</i>        | <i>Gna15</i>   | <i>Mns1</i>   | <i>Rhag</i>    | <i>Tarsl2</i>  |                |
| <i>Cited4</i>        | <i>Hesx1</i>   | <i>Muc6</i>   | <i>Rin1</i>    | <i>Them6</i>   |                |

876

877

878 Supplementary Table 2 – List of antibodies for flow cytometry  
879

| Protein      | Clone     | Fluorochrome | Manufacturer   | Catalog #  |
|--------------|-----------|--------------|----------------|------------|
| CD11b        | M1/70     | APC-Cy7      | SONY           | 1106130    |
| CD16/32      | 93        | PerCP        | SONY           | 1106620    |
| CD16/32      | 2.4G2     | PE           | BD Biosciences | 553145     |
| CD19         | 6D5       | Biotin       | SONY           | 1177520    |
| CD19         | 1D3       | Pacific Blue | BD Biosciences | 562701     |
| CD24         | M1/69     | BV510        | SONY           | 1109155    |
| CD24         | M1/69     | PE-Cy7       | BD Biosciences | 560536     |
| CD31         | MEC13.3   | BUV737       | BD Biosciences | 565097     |
| CD31         | 390       | PerCP-Cy5.5  | Biologend      | 102420     |
| CD324        | DECMA-1   | PE-Cy7       | SONY           | 1336545    |
| CD34         | RAM34     | APC          | eBioscience    | 50-0341-82 |
| CD34         | RAM34     | BV421        | BD Biosciences | 562608     |
| CD41         | MWRReg30  | PE           | BD Biosciences | 561850     |
| CD45         | 30-F11    | Biotin       | SONY           | 1115520    |
| CD45         | 104       | BV650        | SONY           | 1149180    |
| CD54         | YN1/1.7.4 | Pacific Blue | Biologend      | 116116     |
| CD71         | C2        | PE           | BD Biosciences | 553267     |
| Gr1          | RB6-8C5   | FITC         | Biologend      | 108406     |
| Gr1          | RB6-8C5   | Biotin       | BD Biosciences | 553125     |
| Gr1          | RB6-8C5   | BV510        | BD Biosciences | 563040     |
| Il7ra        | A7R34     | Biotin       | eBioscience    | 13-1271-85 |
| Ki-67        | SoIA15    | FITC         | eBioscience    | 11-5698-82 |
| Kit          | 2B8       | APC-Cy7      | SONY           | 1129130    |
| Kit          | 2B8       | APC          | SONY           | 1129060    |
| Kit          | 2B8       | Pacific Blue | Biologend      | 105827     |
| NK1.1        | PK136     | Biotin       | BD Biosciences | 553163     |
| Sca1         | D7        | BV711        | SONY           | 1140655    |
| Ter119       | TER-119   | Biotin       | SONY           | 1181020    |
| Ter119       | TER-119   | PE-Cy7       | SONY           | 1181110    |
| Streptavidin | -         | BV786        | SONY           | 2626245    |
| Streptavidin | -         | APC          | SONY           | 2626035    |
| Streptavidin | -         | PE-Cy7       | SONY           | 2626030    |

880  
881

882  
883  
884

Supplementary Table 3 – List of Primers for qRT-PCR

| Gene    | Gene ID | Primer FW                       | Primer RV                       | PrimerBank ID | SOURCE                              |
|---------|---------|---------------------------------|---------------------------------|---------------|-------------------------------------|
| Actb    | 11461   | GCTTCTTTGCA<br>GCTCCTTCGT       | ATCGTCATCCA<br>TGGCGAACT        | -             |                                     |
| Bmi1    | 12151   | ATCCCCACTTA<br>ATGTGTGTCCT      | CTTGCTGGTCT<br>CCAAGTAACG       | 192203a1      |                                     |
| Epor    | 13857   | GGGCTCCGAA<br>GAACTTCTGTG       | ATGACTTTTCGT<br>GACTCACCT       | 116292185c1   |                                     |
| Gata1   | 14460   | ATCAGCACTGG<br>CCTACTACAGA<br>G | GAGAGAAGAAA<br>GGACTGGGAAA<br>G | -             | (Kozhemyakina <i>et al.</i> , 2014) |
| Hbb-b1  | 15129   | GCACCTGACTG<br>ATGCTGAGAA       | TTCATCGGCGT<br>TCACCTTTCC       | 31982300a1    |                                     |
| Hbb-bh1 | 15132   | TGGACAACCTC<br>AAGGAGACC        | TGCCAGTGTAC<br>TGGAAATGGA       | -             | (Otsuka <i>et al.</i> , 2016)       |
| Hbb-y   | 15135   | TGGCCTGTGGA<br>GTAAGGTCAA       | GAAGCAGAGGA<br>CAAGTTCCCA       | 6680177a1     |                                     |
| Klf1    | 16596   | AGACTGTCTTA<br>CCCTCCATCAG      | GGTCTCCGAT<br>TTCAGACTCAC       | 6754454a1     |                                     |
| Lmo2    | 16909   | ATGTCCTCGGC<br>CATCGAAAG        | CGGTCCCCTAT<br>GTTCTGCTG        | 6678702a1     |                                     |
| Myb     | 17863   | AGACCCCGACA<br>CAGCATCTA        | CAGCAGCCCAT<br>CGTAGTCAT        | 19526459a1    |                                     |
| Runx3   | 12399   | CAGGTTCAACG<br>ACCTTCGATT       | GTGGTAGGTAG<br>CCACTTGGG        | 9789899a1     |                                     |

885  
886

887  
888  
889

Supplementary Table 4 –Taqman probes for Single-Cell Multiplex Gene Expression

| Gene    | Gene ID             | Taqman Assay ID |
|---------|---------------------|-----------------|
| Bmi1    | 12151               | Mm00776122_gH   |
| Cebpa   | 12606               | Mm00514283_s1   |
| Csf1r   | 12978               | Mm01266652_m1   |
| Csf2ra  | 12982               | Mm00438331_g1   |
| Csf3r   | 12986               | Mm00432735_m1   |
| Epor    | 13857               | Mm00833882_m1   |
| Gata1   | 14460               | Mm01352636_m1   |
| Gata2   | 14461               | Mm00492301_m1   |
| Hbb-b1  | 15129               | Mm01611268_g1   |
| Hbb-bh1 | 15132               | Mm00433932_g1   |
| Hbb-y   | 15135               | Mm00433936_g1   |
| mKi-67  | 17345               | Mm01278617_m1   |
| Kit     | 16590               | Mm00445212_m1   |
| Klf1    | 16596               | Mm00516096_m1   |
| Lmo2    | 16909               | Mm01281680_m1   |
| Ly6c    | 17067 and 100041546 | Mm03009946_m1   |
| Mpl     | 17480               | Mm00440310_m1   |
| Myb     | 17863               | Mm00501741_m1   |
| Runx1   | 12394               | Mm01213404_m1   |
| Runx2   | 12393               | Mm03003491_m1   |
| Runx3   | 12399               | Mm00490666_m1   |
| Tal1    | 21349               | Mm01187033_m1   |
| Zfp1    | 22761               | Mm00494336_m1   |
| Actb    | 11461               | Mm01205647_g1   |
| Gapdh   | 14433               | Mm99999915_g1   |
| Hprt    | 15452               | Mm03024075_m1   |

890  
891

**Figure 1**

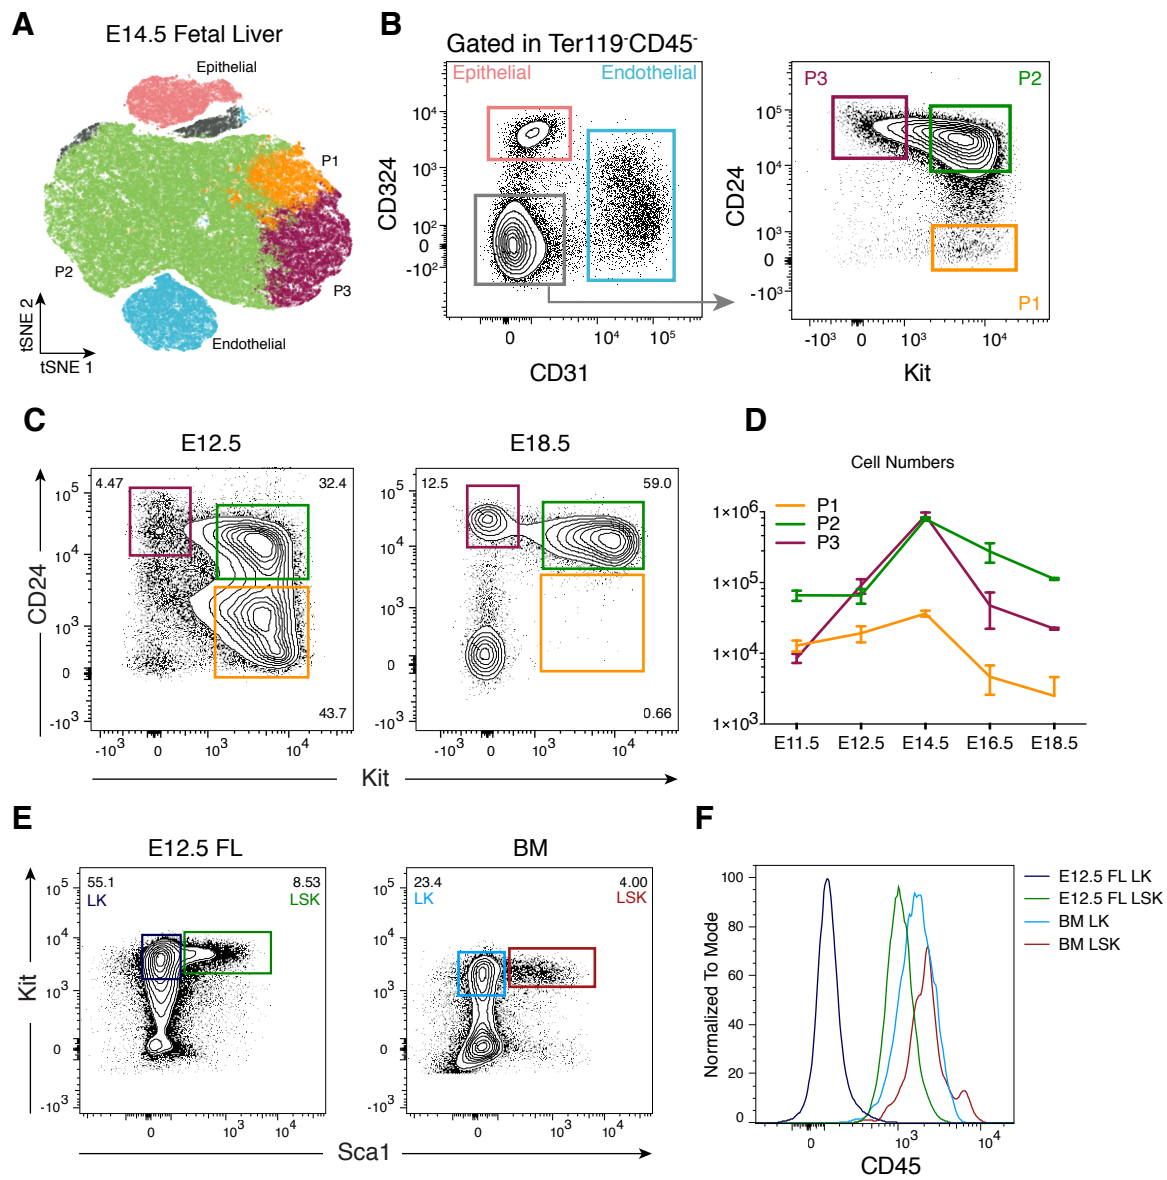



**Figure 2**

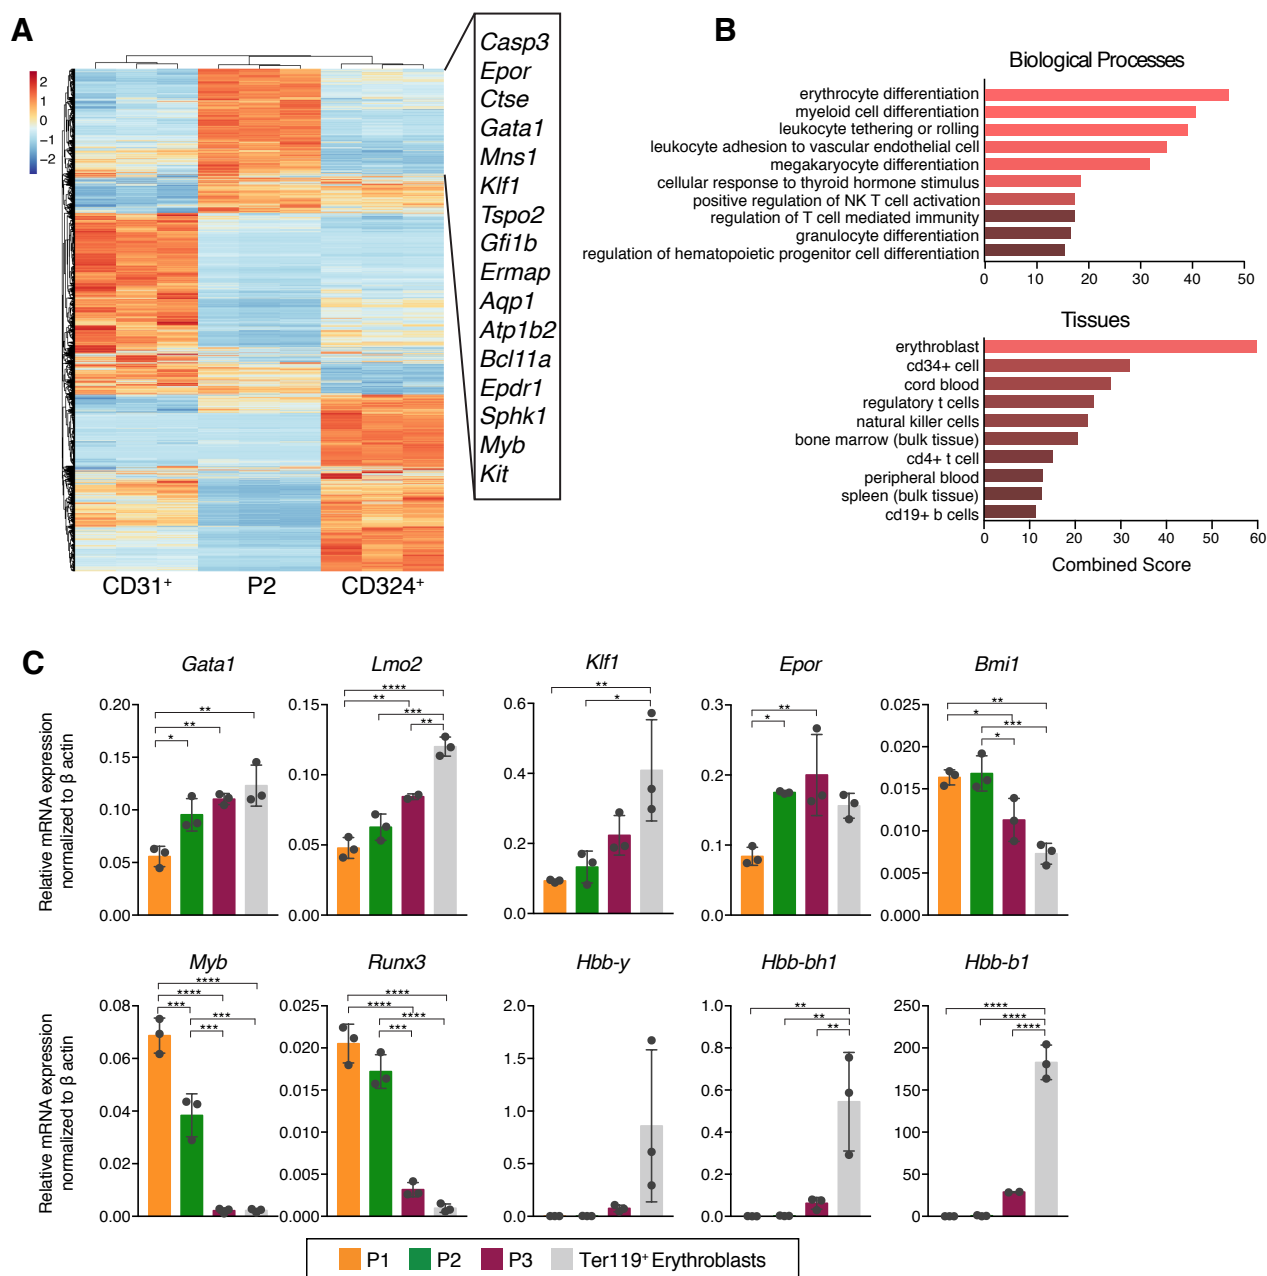

## Figure 3

**A**

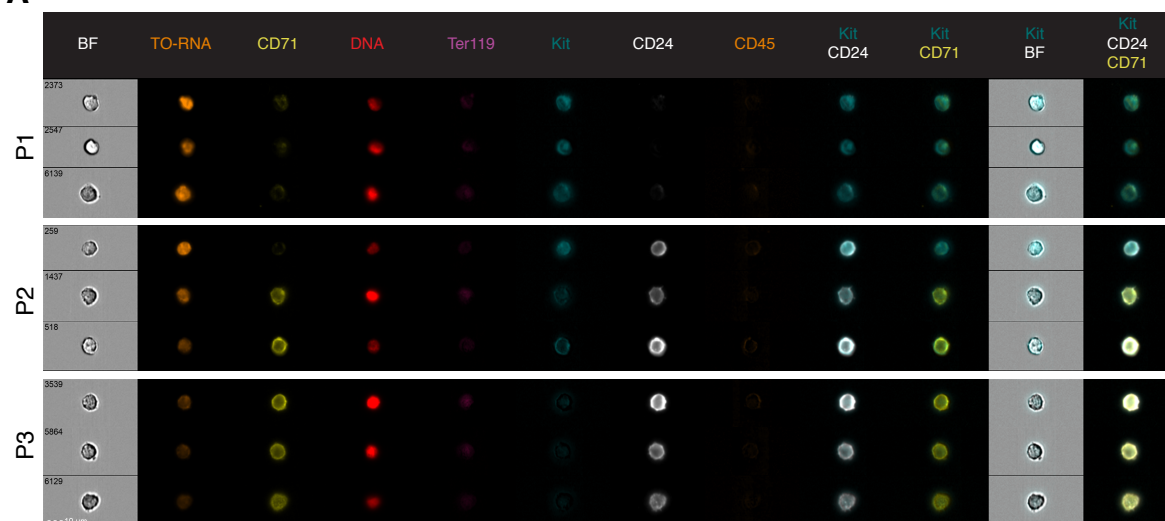

**B**

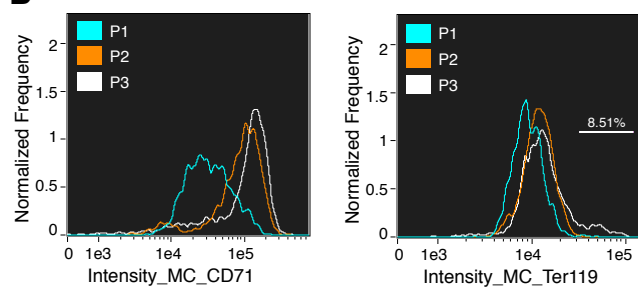

**C**

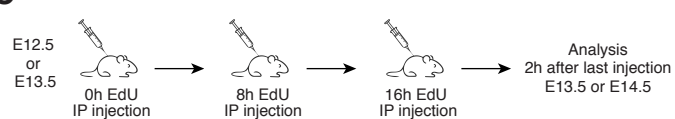

**D**

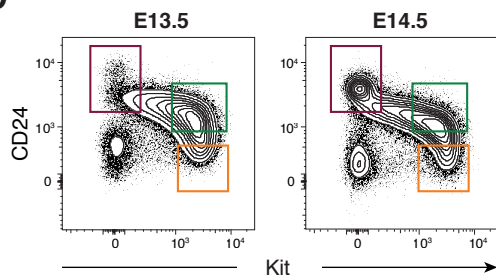

**E**

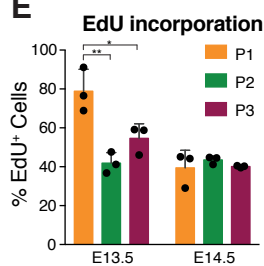

**F**

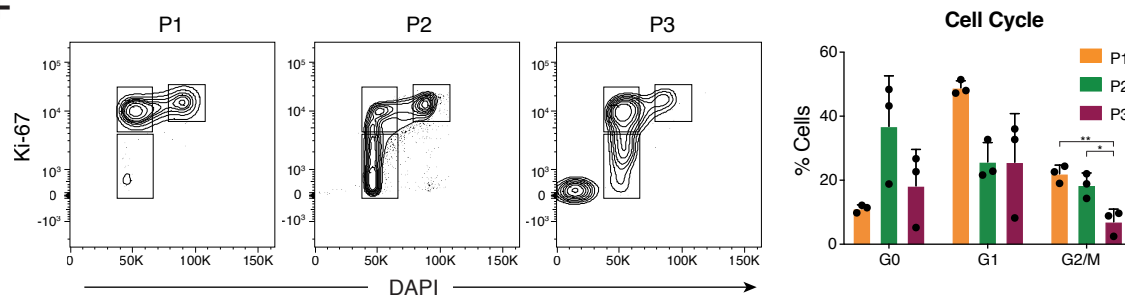

**Figure 4**

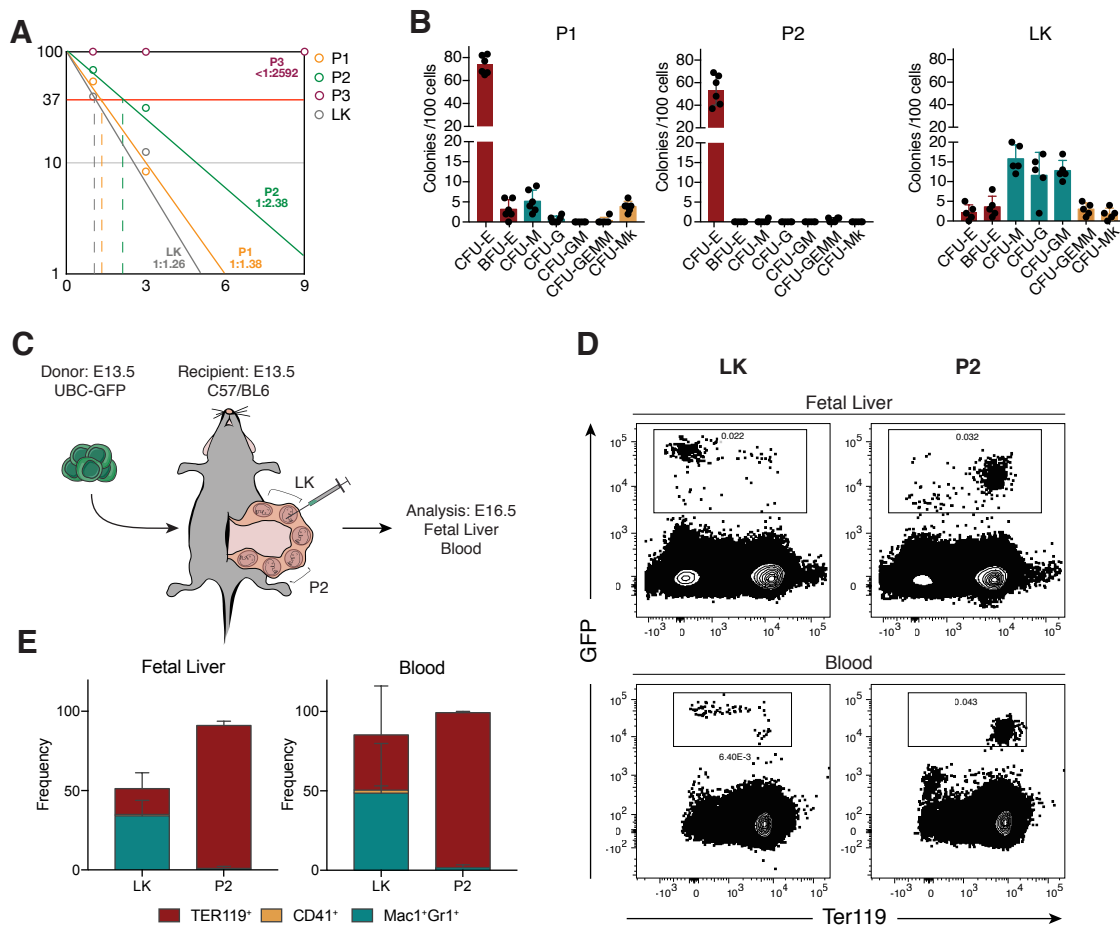

## Figure 5

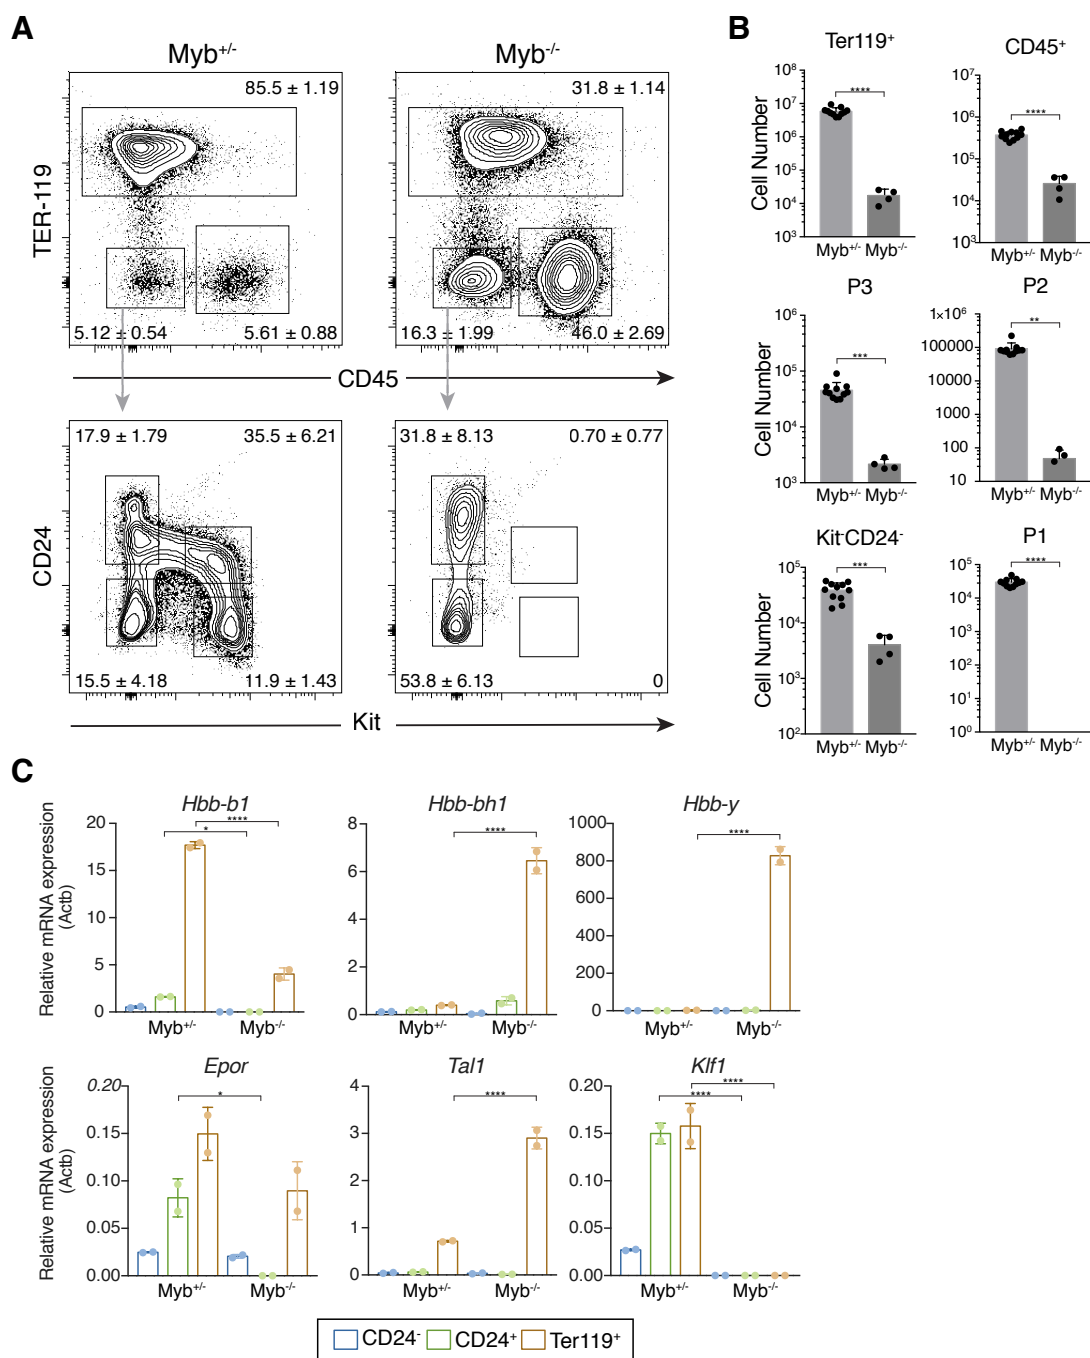

## Figure 6

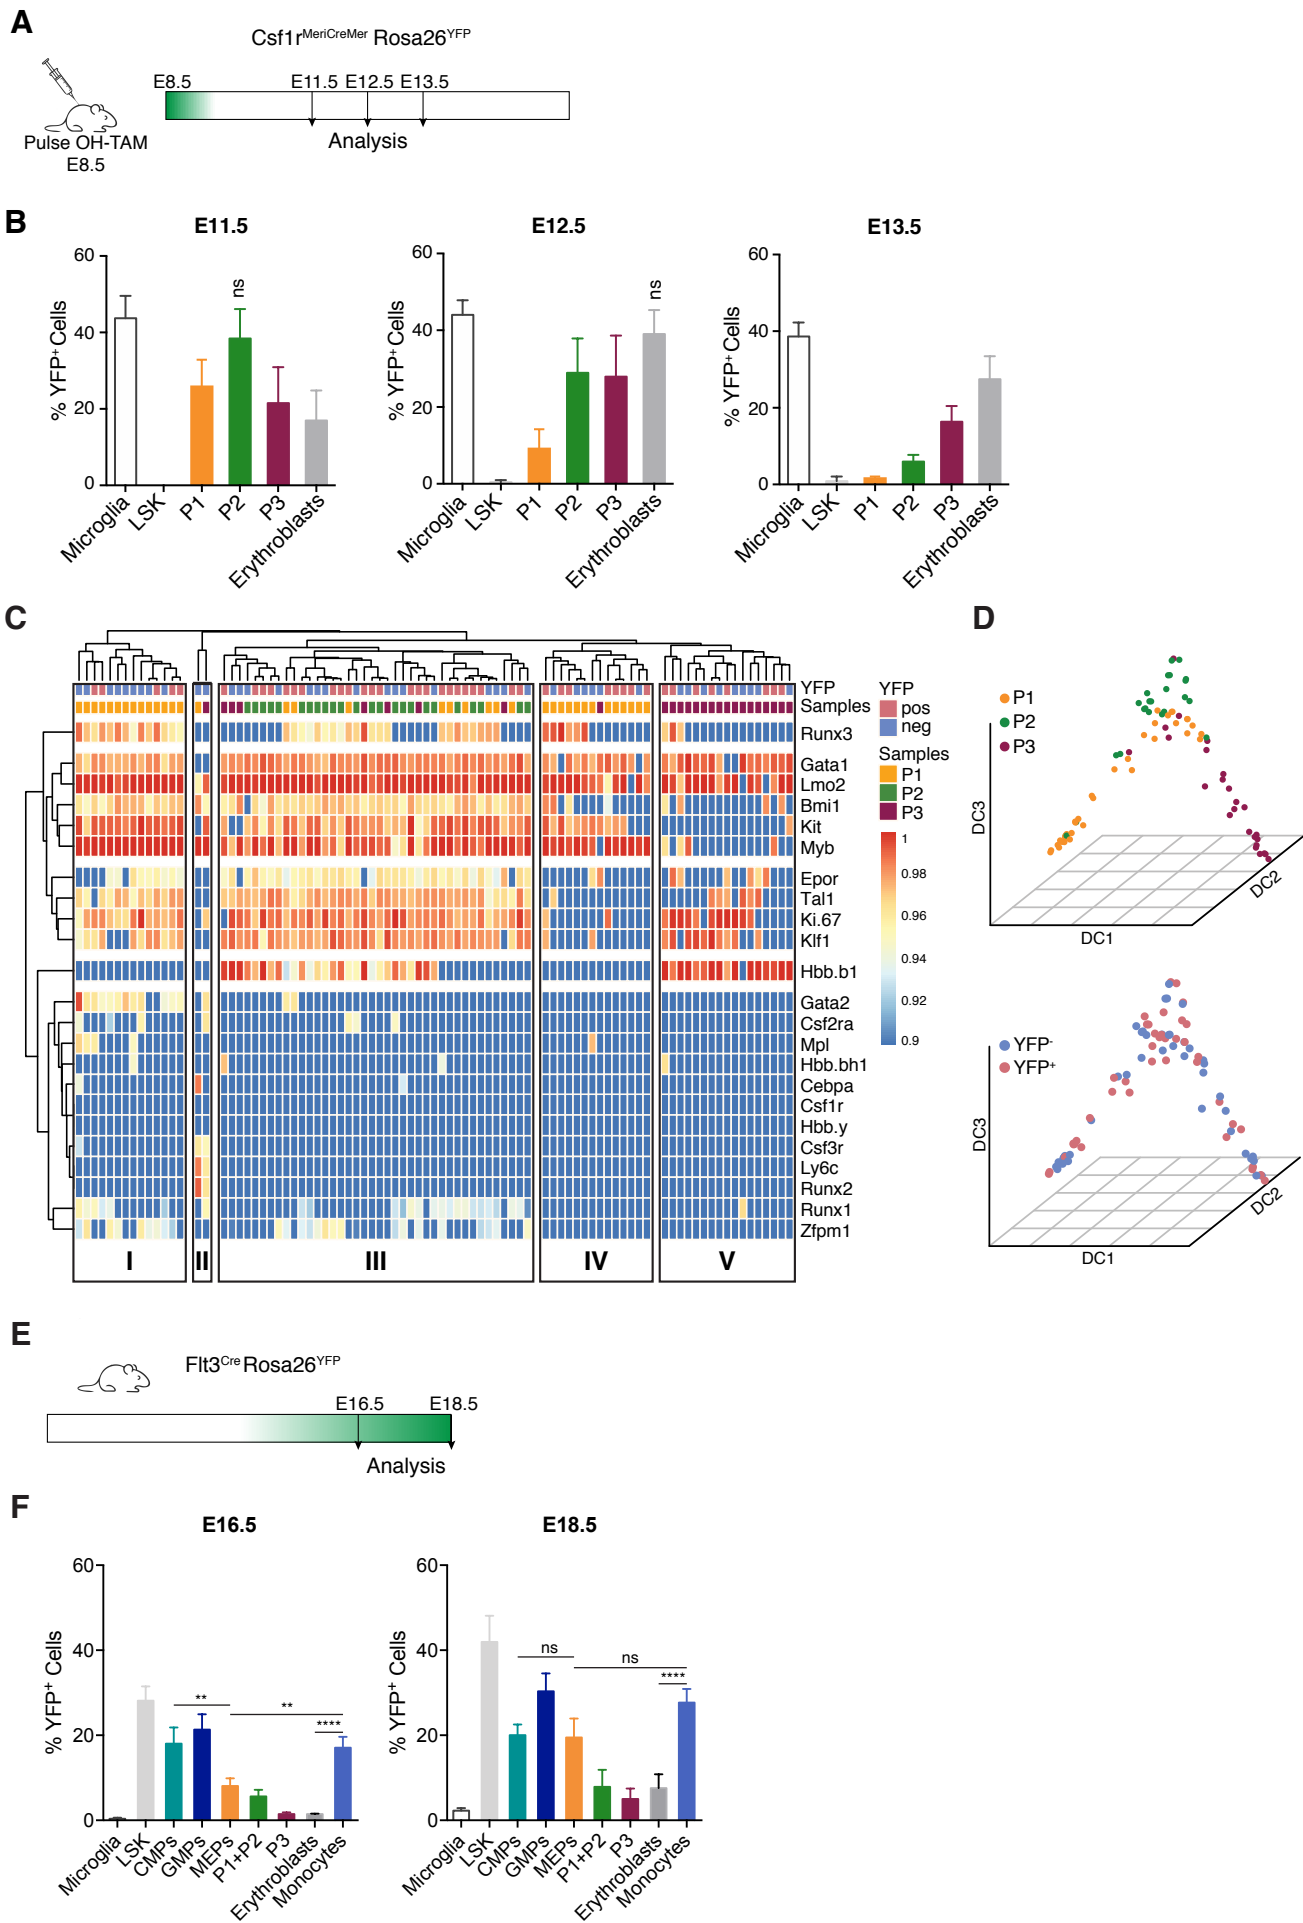

## Supplementary Figure 1

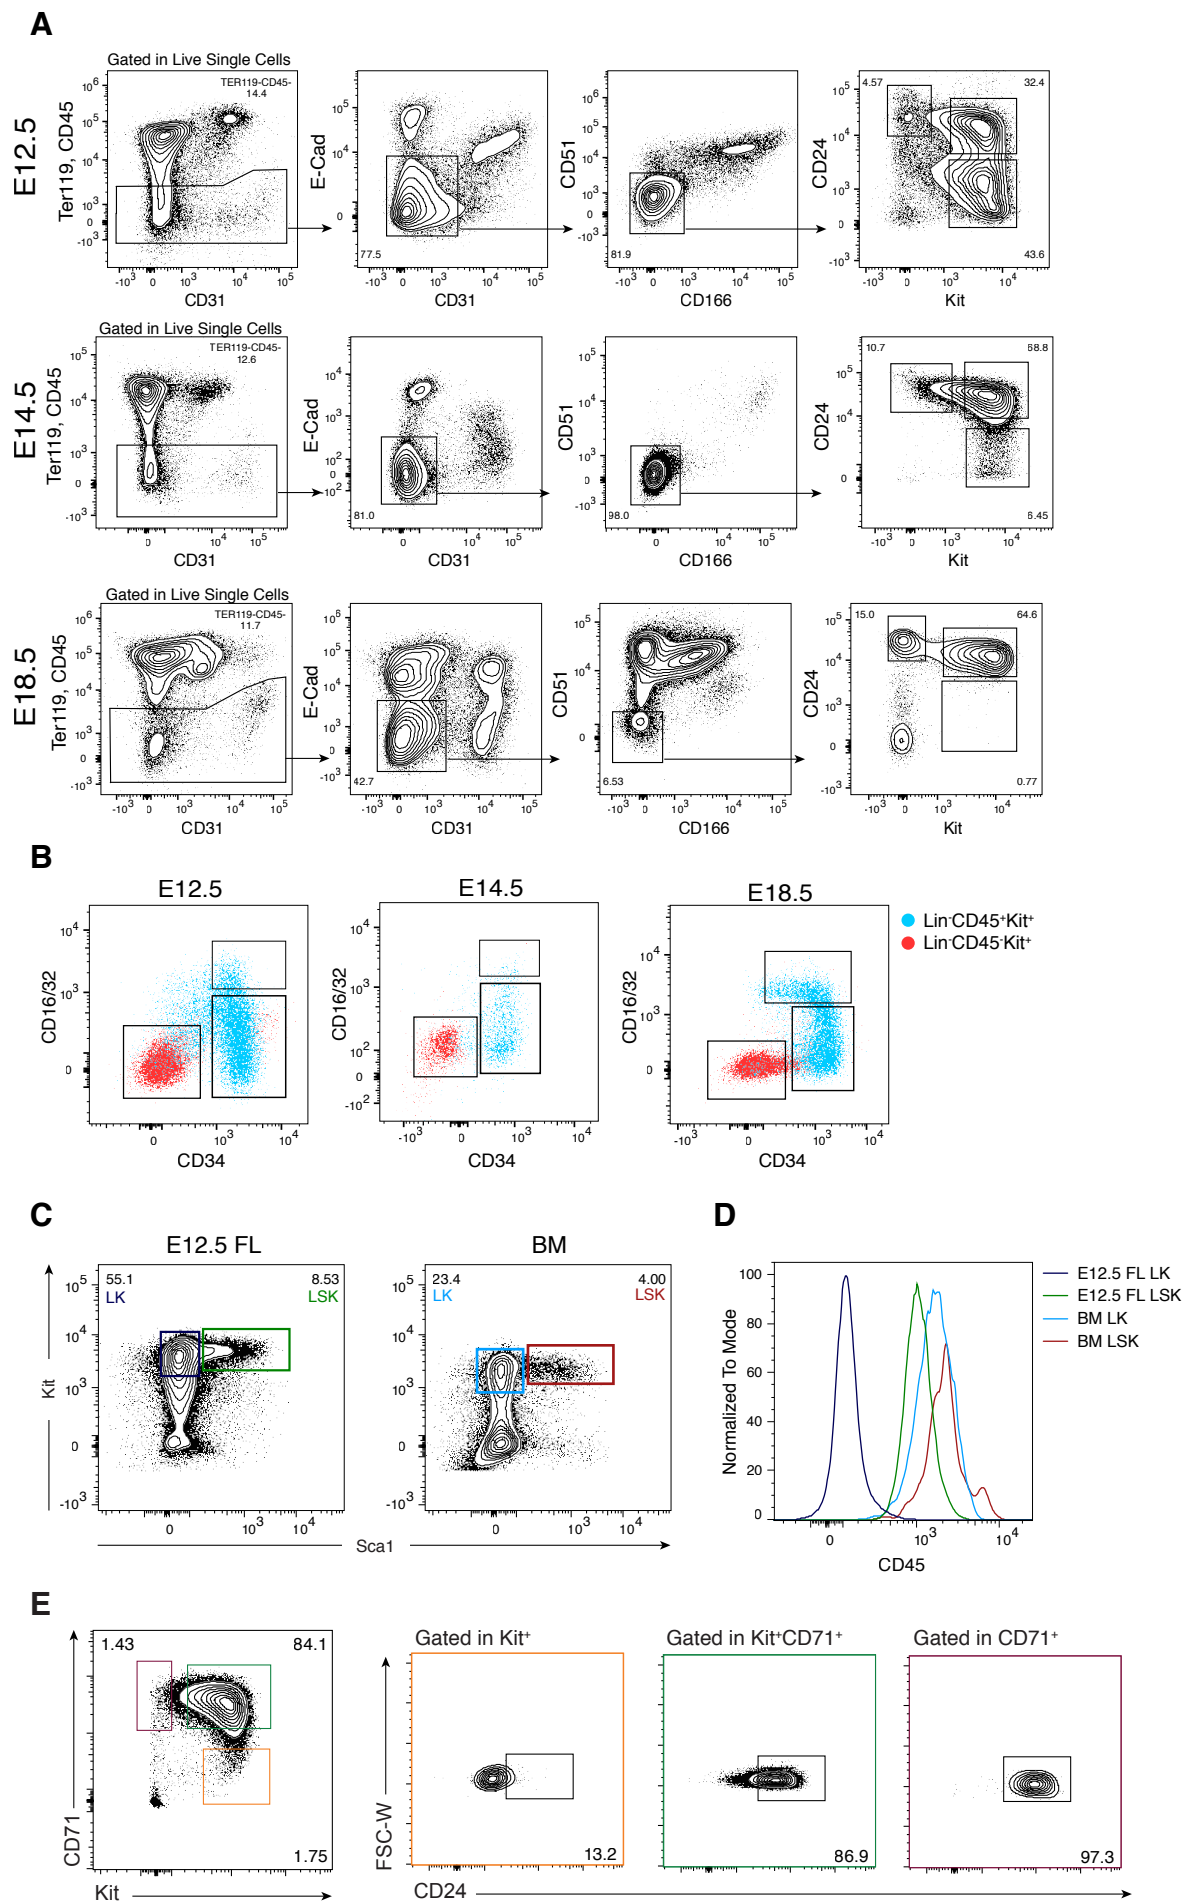

## Supplementary Figure 2

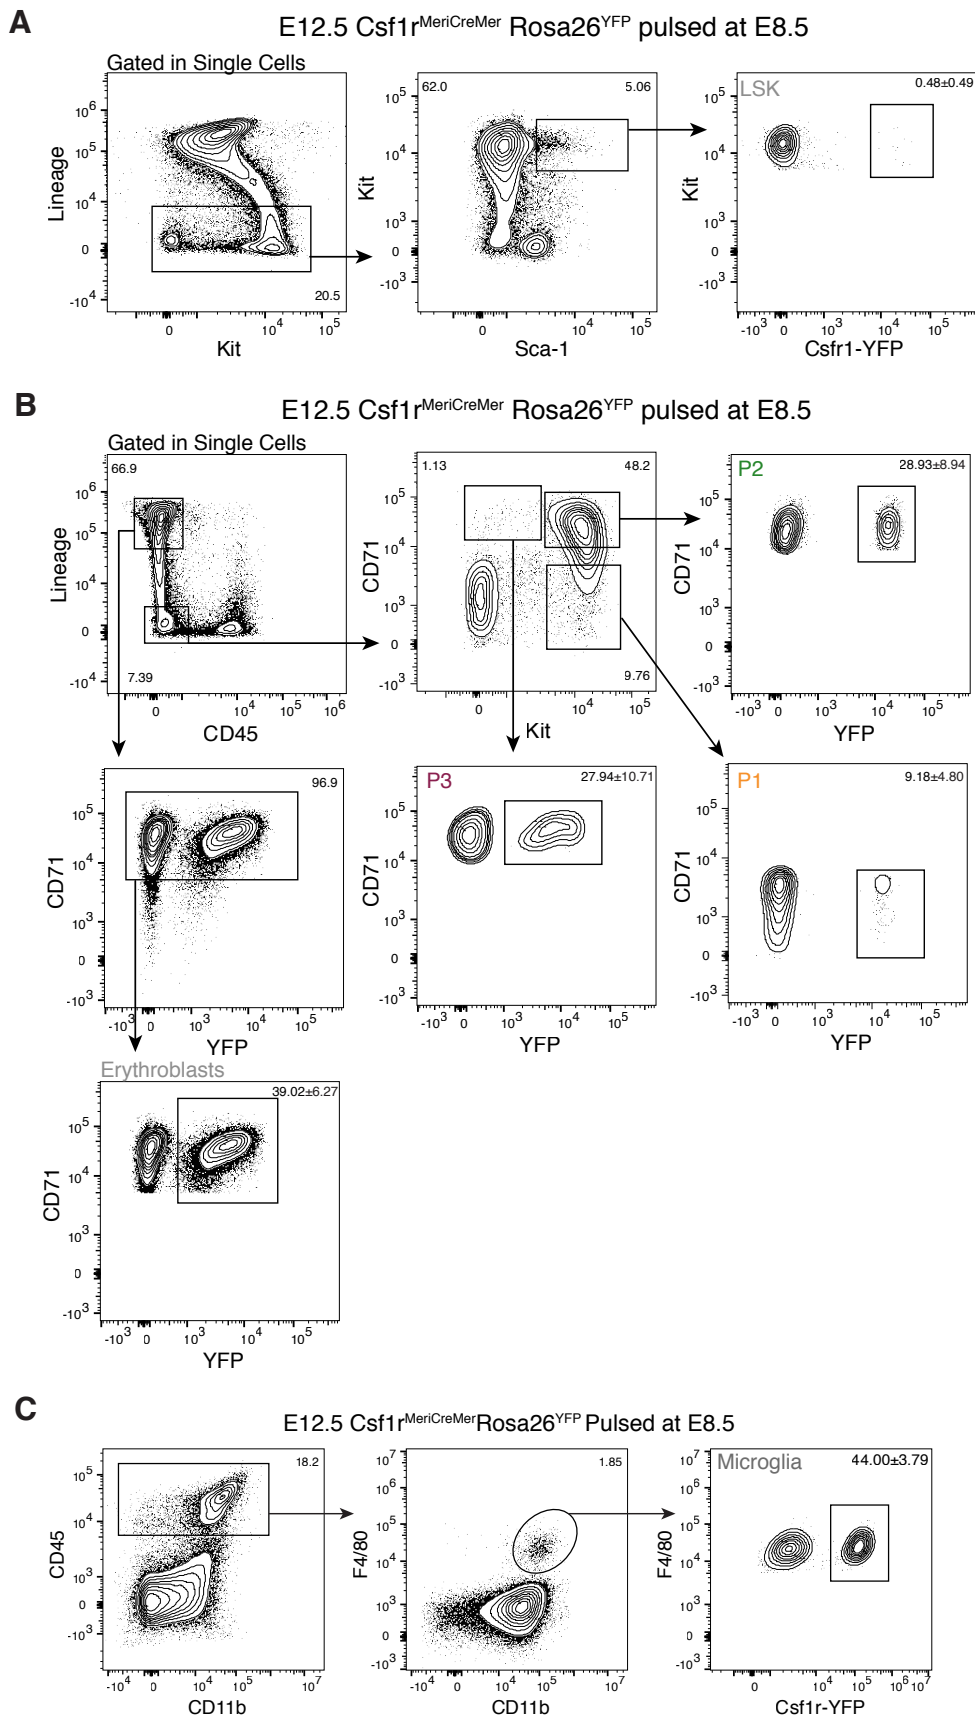

### Supplementary Figure 3

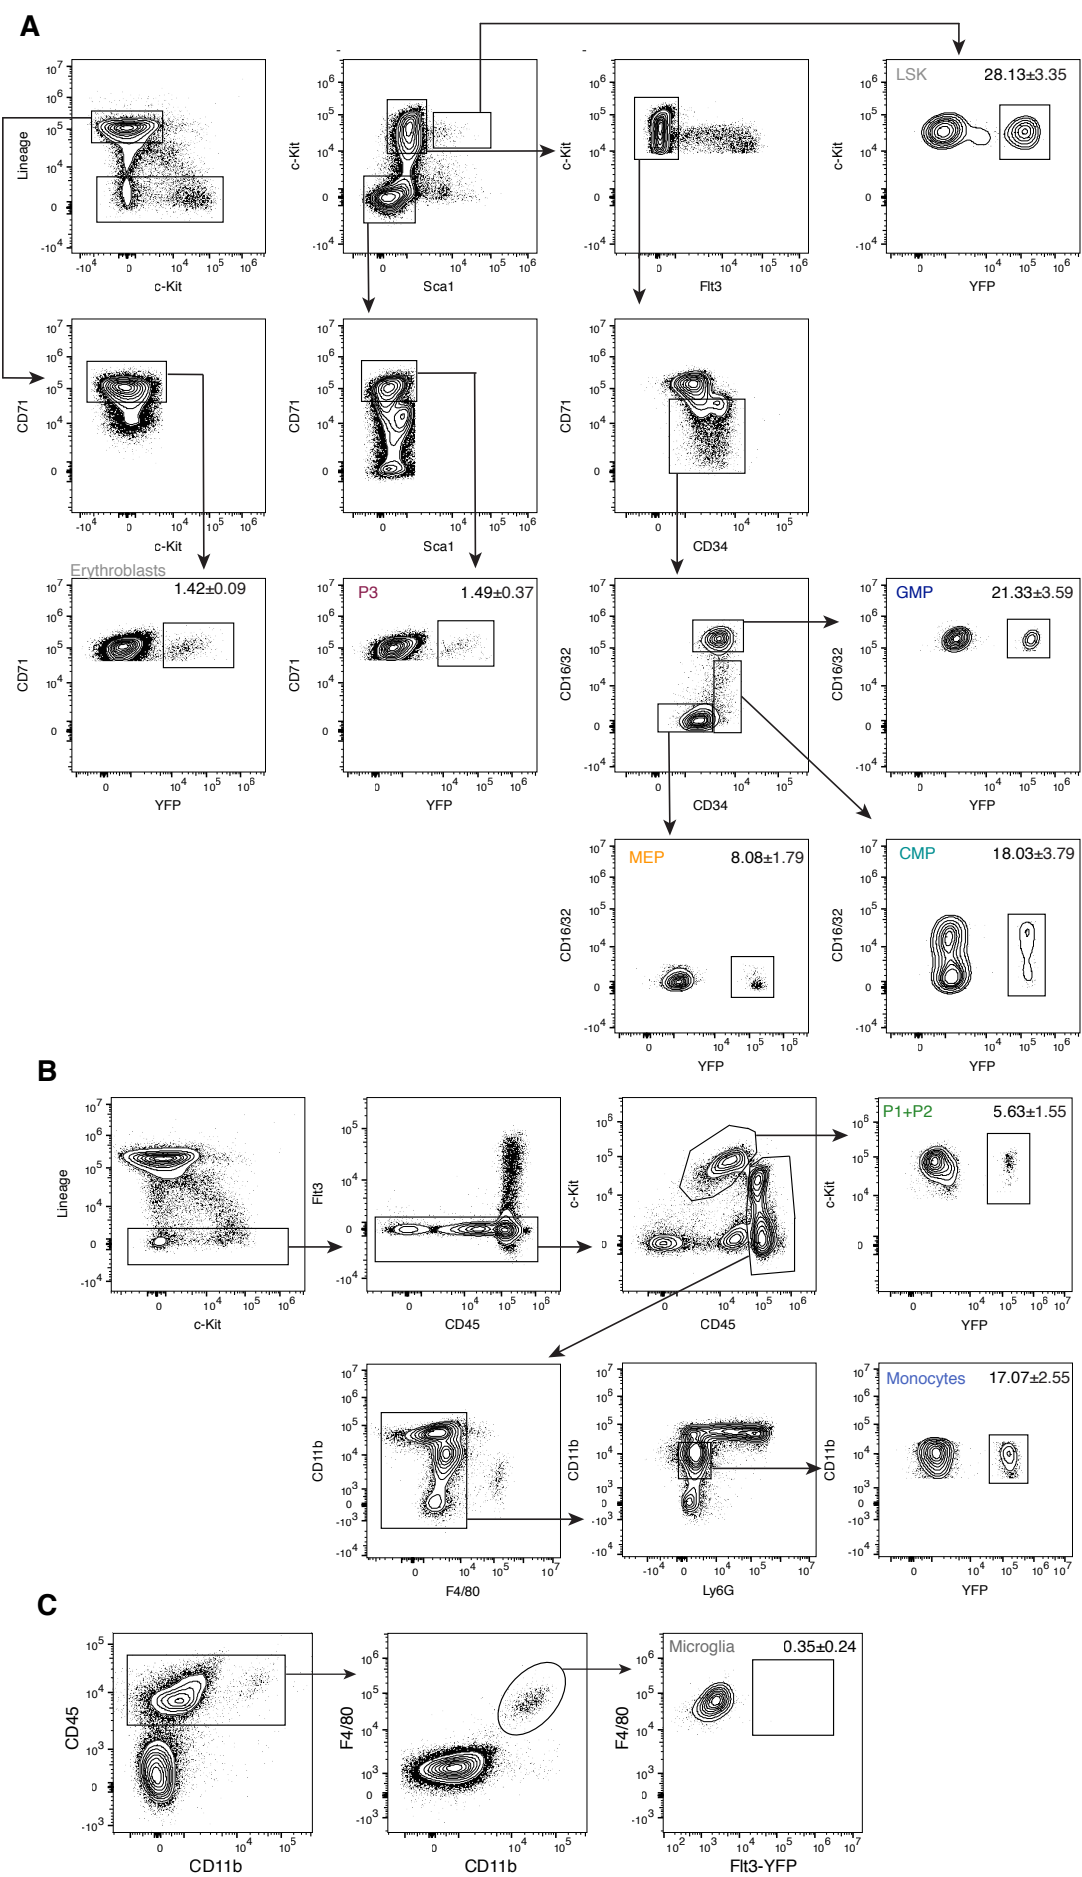



## Supplementary Figure 4

A

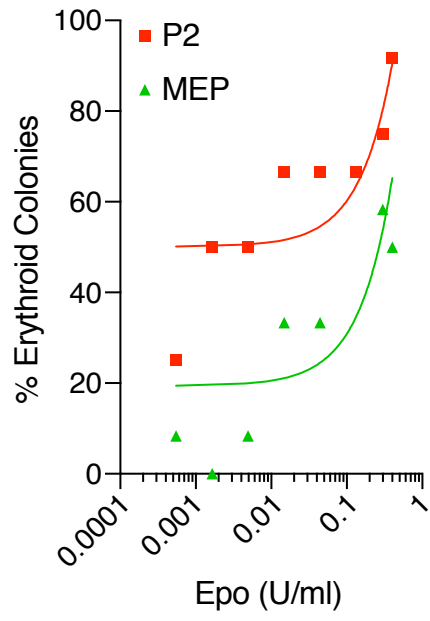

## Supplementary Figure 5

A

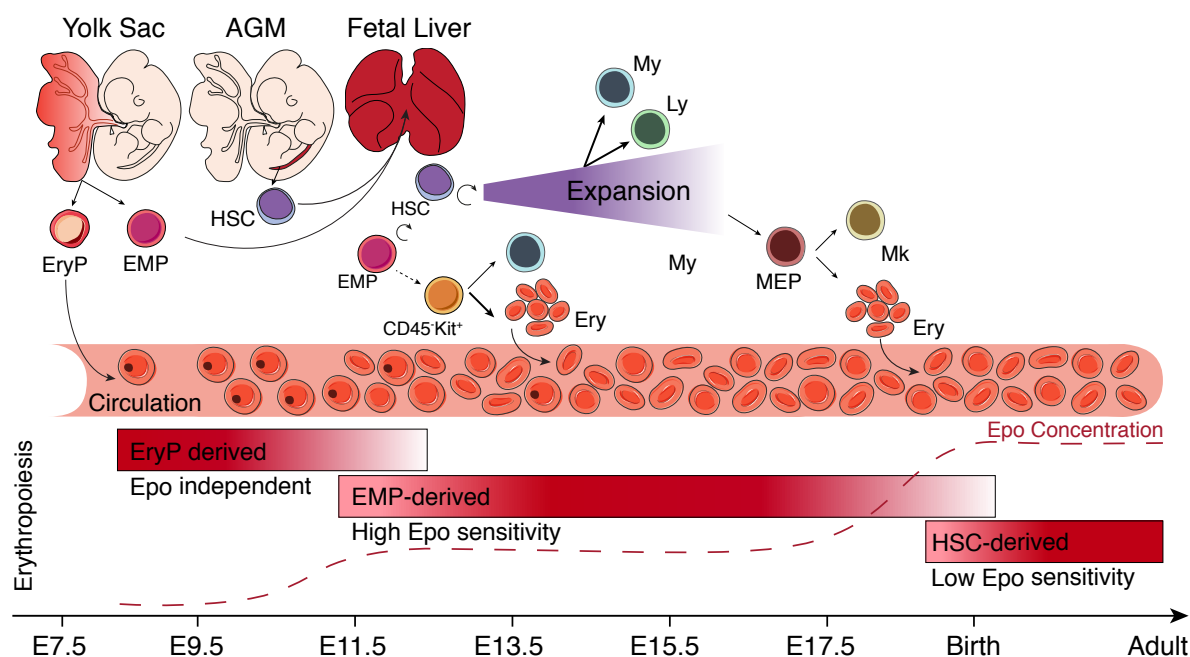

Source: https://www.biorxiv.org/content/10.1101/2020.02.27.968230v1.full.pdf
